# Supplementary material for: Origin and evolution of the nuclear auxin response system
Source: eLife journal article supplement (doi:10.7554/elife.33399), 2018-03-26

**A**

|          |                                                                                         |    |
|----------|-----------------------------------------------------------------------------------------|----|
| AA       | L S M L C V F P I Q P D M D S C P G R S L G V A R K P F                                 |    |
| WT       | 5' TTATCAATGCTCTGTGTGTTTCCCATTC AACCTGATATGGACTCTTGCCAGGCCGCTCTTTGGGAGTTGCGCGAAAACCTTTC | 3' |
| nciaa-6  | 5' TTATCAATGCTCTGTGTGTTTCCCATTC AACCTGATATGGACTCTTGCCAGGCCGCTCTTTGGGAGTTGCGCGAAAACCTTTC | 3' |
| nciaa-10 | 5' TTATCCGTATATGATATCCATGCACAATACAGGATTGTTATCCGTATATGGATATATATGGATATAACGCCCATGTTAA----- | 3' |

  

|          |                                           |                         |               |
|----------|-------------------------------------------|-------------------------|---------------|
| AA       | P P P                                     | R L R S V K             | E K P H Q F K |
| WT       | 5' CCACCTCCG-----AGGTTGCGGTCCGTAAG        | GAAAAACCCACCAATTTAAG 3' |               |
| nciaa-6  | 5' CCACCTCCGTTTGGAGTGGGTGAGTCACCGTCCGTAAG | GAAAAACCCACCAATTTAAG 3' |               |
| nciaa-10 | 5' -----CCACCAATTTAAG 3'                  |                         |               |

**B**

|          |                                                             |                        |
|----------|-------------------------------------------------------------|------------------------|
| AA       | W M R L Q Q Q K L E P A A P T T P L                         | S L P P L P            |
| WT       | 5' TGGATGCGACTACAGCAGCAGAAATTAGAACTGCA-GCACCAGACAACCTCTCTC  | AGCCTTCCTCCCTTGCCCT 3' |
| ncarf-2  | 5' TGGATGCGACTACAGCAGCAGAAATTAGAACCTGCACGCACCAGACAACCTCTCTC | AGCCTTCCTCCCTTGCCCT 3' |
| ncarf-10 | 5' TGGAT-----TCATTAGCCT 3'                                  |                        |

**C**

|                       |                                                                                                 |           |
|-----------------------|-------------------------------------------------------------------------------------------------|-----------|
| AA                    | Q L W H A C                                                                                     | A G G M V |
| WT                    | 5' CAGCTGTGGCAGCCTG-----CGCAGGAGGCATGGTG 3'                                                     |           |
| arf3 <sup>ge1-1</sup> | 5' CAGCTGTGGCAGCCTG-----GAGGCATGGTG 3'                                                          |           |
| arf3 <sup>ge1-2</sup> | 5' CAGCTGCGTGGCAGCTGCGGATCAGGCCCCGCATCAGGCCGGCCATGCCTCTGCGGATCAGGCCGGCAGCTCCG CAGGAGGCATGGTG 3' |           |

**D**

|                       |                                                       |
|-----------------------|-------------------------------------------------------|
| AA                    | E K P A S F A K T L T Q S D A N                       |
| WT                    | 5' GAGAAGCCGGCCTCGTTCCGCAAGACGCTCAGCAGAGCGACGCCAAC 3' |
| arf3 <sup>ge2-1</sup> | 5' GAGAAGCCGGCCTCGT-----CGCTCAGCAGAGCGACGCCAAC 3'     |

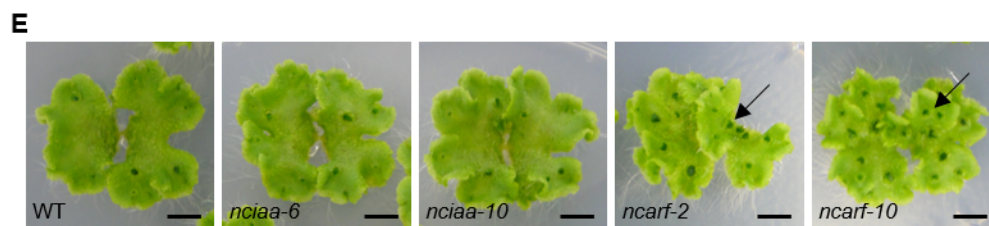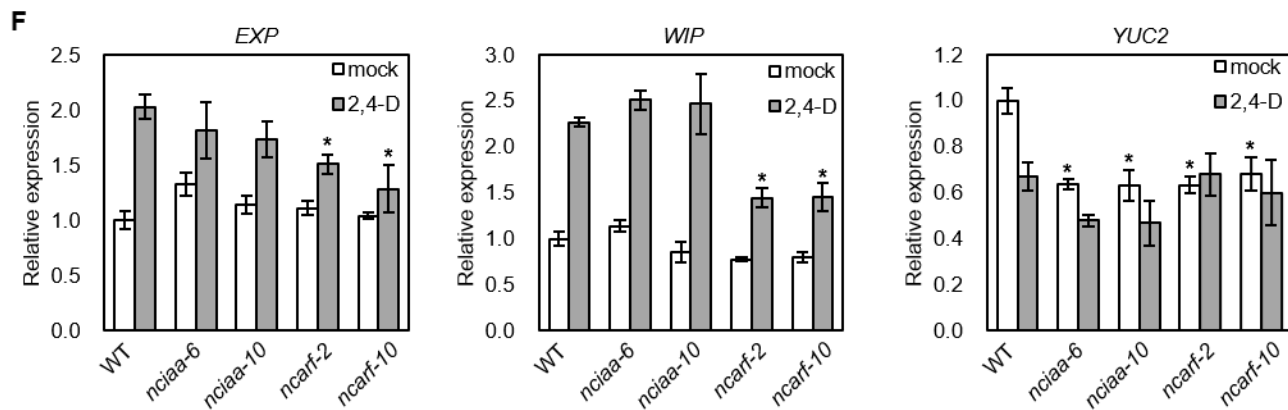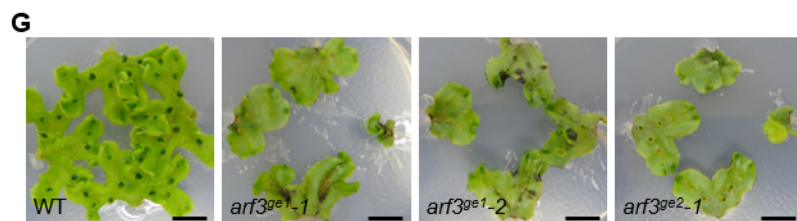

Supplement: supp [file elife-33399-supp-v1.zip]
