# Supplementary material for: Origin and evolution of the nuclear auxin response system
Source: eLife journal article supplement (doi:10.7554/elife.33399), 2018-03-26

Colored clades

- Cycadales
- Conifers
- Ferns
- GreenAlgae
- Ginkgo
- Gnetales
- Hornworts
- Lycophytes
- Liverworts
- Mosses
- BasalAngiosperms
- BasalEudicots
- Chloranthales
- Magnoliids

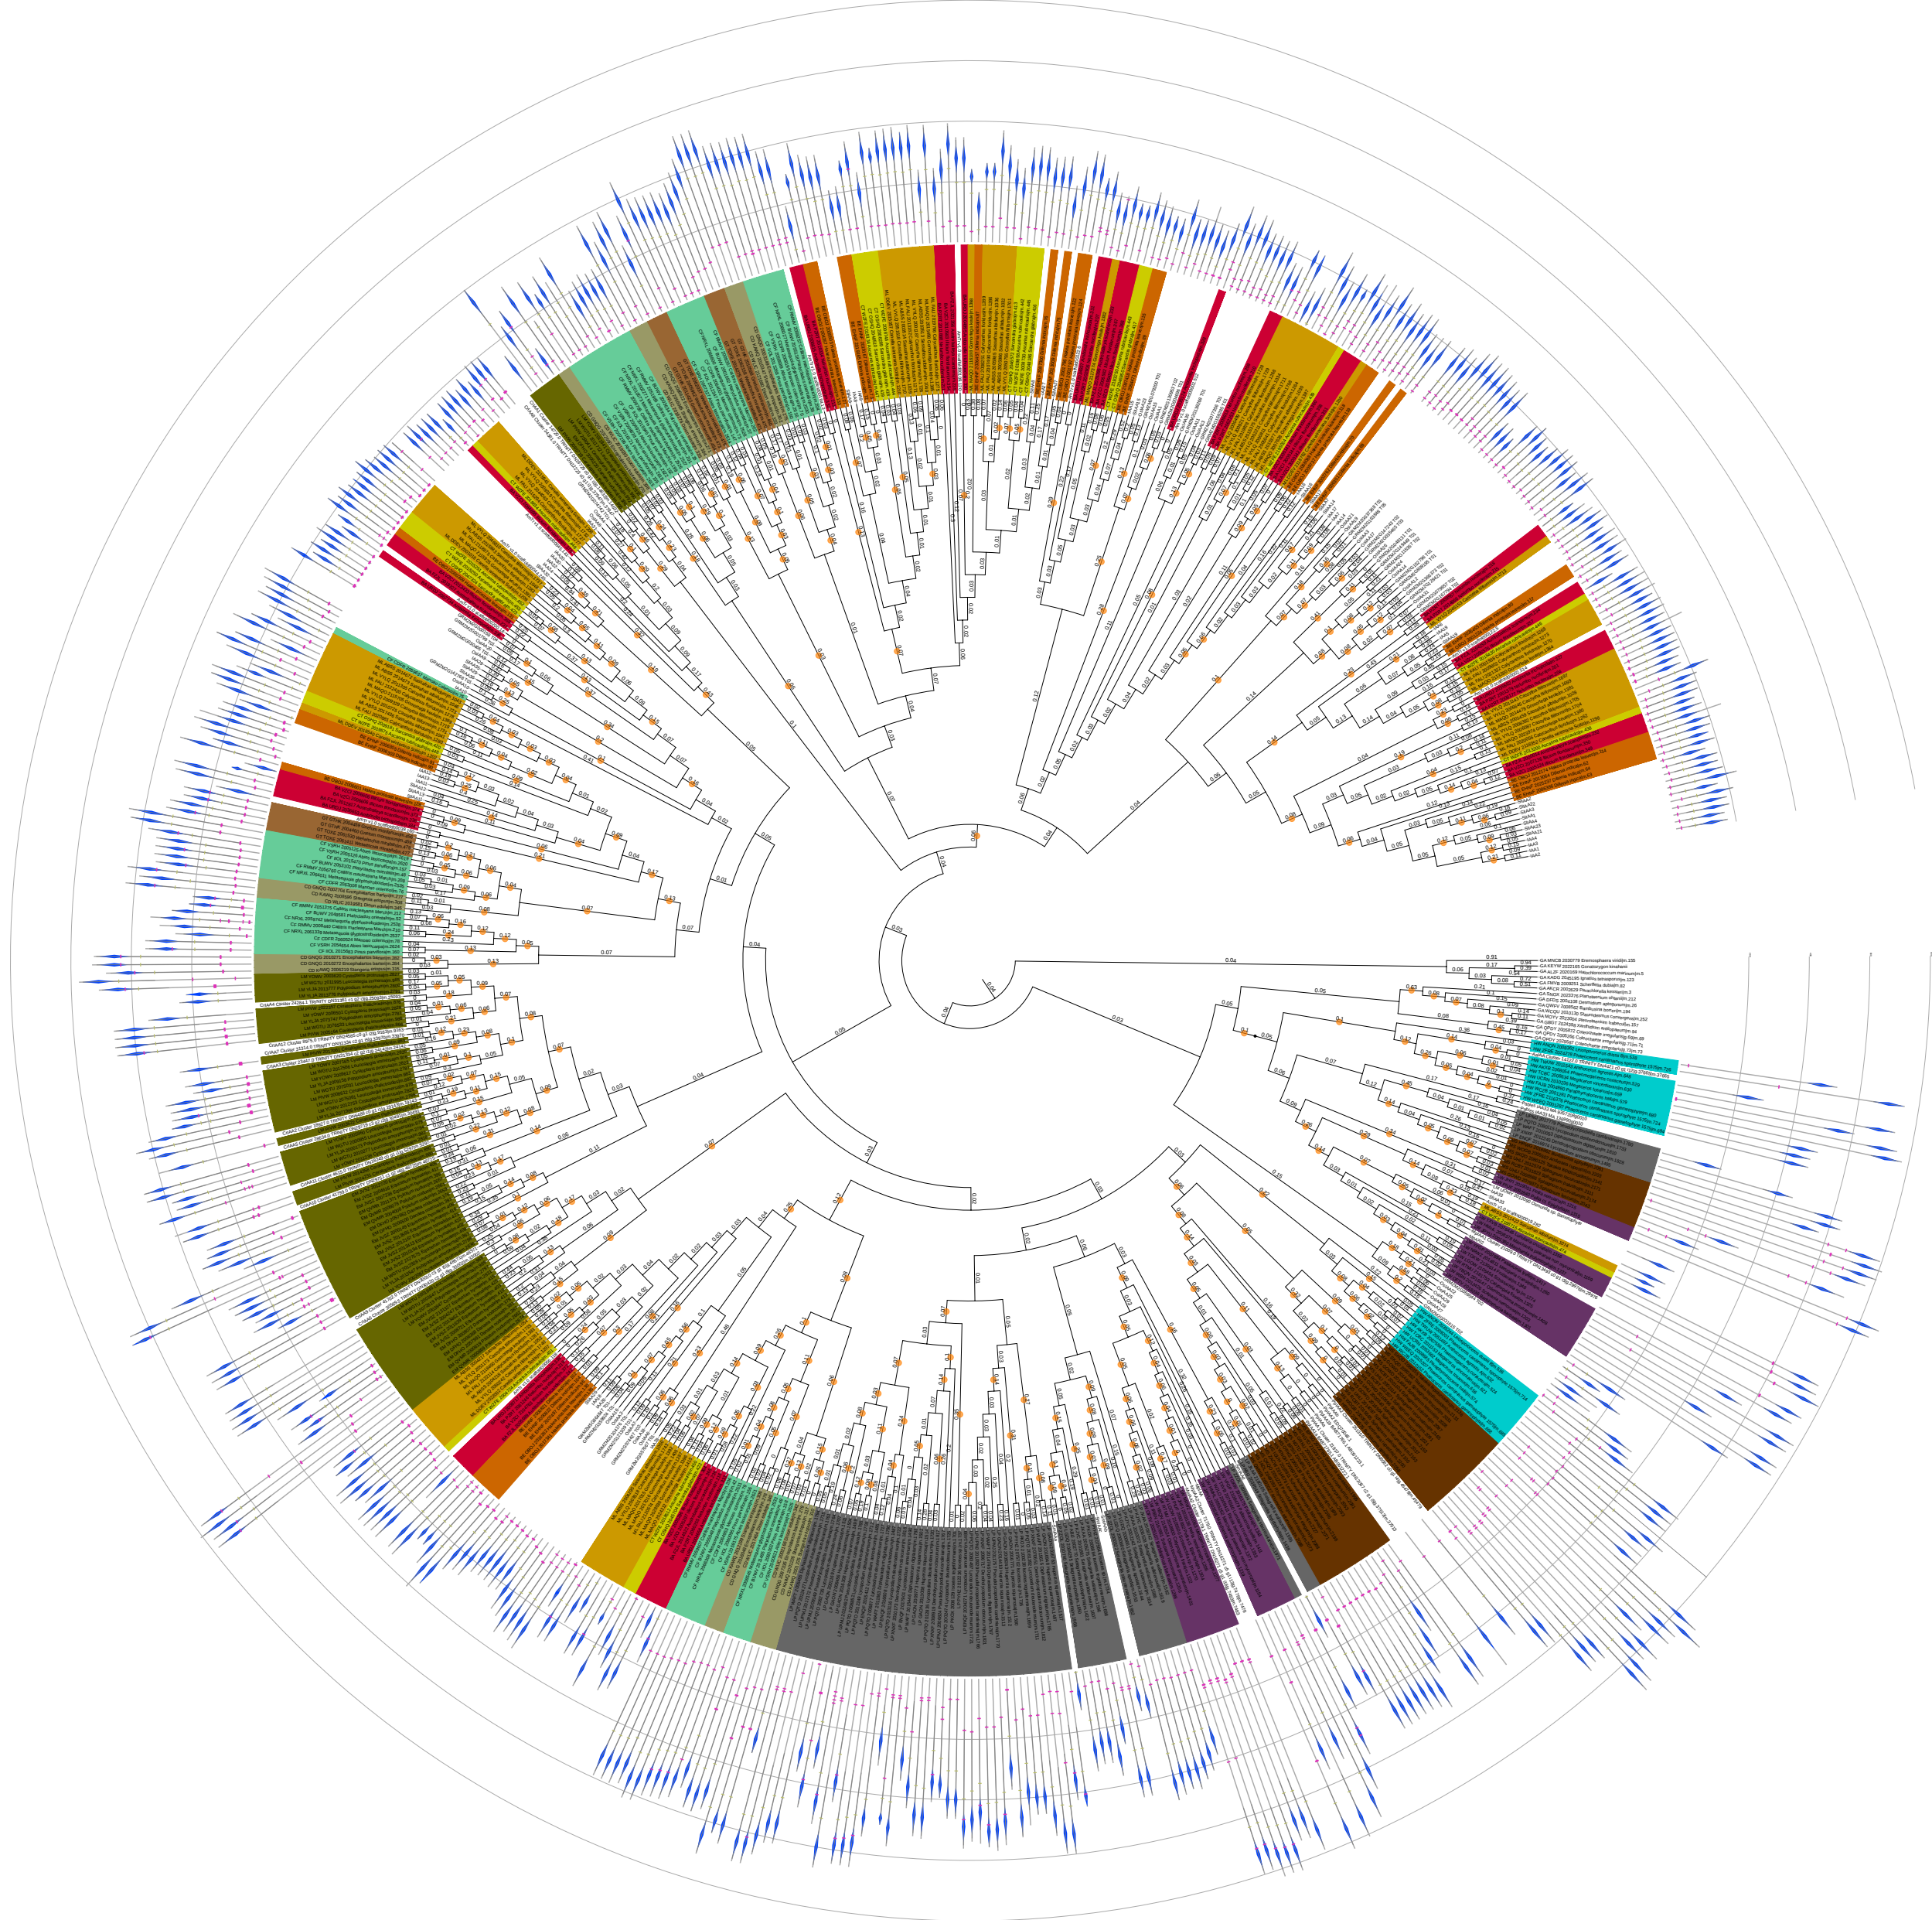

Supplement: supp [file elife-33399-supp-v1.zip]
