# Supplementary material for: Origin and evolution of the nuclear auxin response system
Source: eLife journal article supplement (doi:10.7554/elife.33399), 2018-03-26
Supplement: supp [file elife-33399-supp-v1.zip]

Archive with 18 entries (18 files):
- elife_poa_e33399_Supplementary_File_2.pptx
- elife_poa_e33399_Figure_4_figure_supplement_1.pdf
- elife_poa_e33399_Figure_6_figure_supplement_2.pdf
- elife_poa_e33399_Figure_1_figure_supplement_2.pdf
- elife_poa_e33399_Figure_4_figure_supplement_2.pdf
- elife_poa_e33399_Figure_5_source_data_1.xlsx
- elife_poa_e33399_Figure_4_figure_supplement_3.pdf
- elife_poa_e33399_Figure_5_source_data_2.xlsx
- elife_poa_e33399_Figure_7_figure_supplement_1.pdf
- elife_poa_e33399_Figure_2_figure_supplement_1.pdf
- elife_poa_e33399_Supplementary_File_3.xlsx
- elife_poa_e33399_Figure_1_figure_supplement_3.pdf
- elife_poa_e33399_Figure_6_figure_supplement_1.pdf
- elife_poa_e33399_Figure_1_figure_supplement_1.pdf
- elife_poa_e33399_Supplementary_File_1.xlsx
- elife_poa_e33399_Supplementary_File_4.zip
- elife_poa_e33399_Transparent_Reporting_File.docx
- elife_poa_e33399_Supplementary_File_5.zip
