# Supplementary material for: Origin and evolution of the nuclear auxin response system
Source: eLife journal article supplement (doi:10.7554/elife.33399), 2018-03-26
Supplement: supp [file elife-33399-supp-v1.zip › elife_poa_e33399_Figure_5_source_data_1.xlsx]

## Sheet: Sheet1
Figure 5¾Figure supplement 1. Number of DEG in de novo assembly- or genome-based transcriptome analysis.
	De novo assembly-based		Genome-based		% Match (b/a)
	Number of DEG	Matches to genome data (a)	Number of DEG	Matches to de novo data (b)
K. nitens	1094	970	1265	874	90.1
M. polymorpha	105	98	98	67	68.4
P. patens	1090	1035	1138	840	81.2
