# Supplementary material for: Origin and evolution of the nuclear auxin response system
Source: eLife journal article supplement (doi:10.7554/elife.33399), 2018-03-26
Supplement: supp [file elife-33399-supp-v1.zip › elife_poa_e33399_Figure_5_source_data_2.xlsx]

## Sheet: Sheet1
Figure 5¾Figrue supplement 2. Summary statistics of comparative RNA-seq analysis.
Species	Trinity Assembly Length (bp)	Corset Assembly Length (bp)	Trinity Transcripts	Corset Transcripts	Trinity Genes	Corset	GC%	DEG	DEG	DEG
						Genes		(up)	(down)	(total)
						(Clusters)
K. nitens	103789047	96017668	90079	62718	62978	36209	55	409	685	1094
S. pratensis	73580548	67121353	79576	55877	47425	26062	39	563	1118	1681
A.agrestis	305335425	302084291	155454	143697	43514	36512	51	65	94	159
M. polymorpha	127811269	121162080	87527	63666	52502	30749	48	56	49	105
P. patens	294940461	288755562	163952	141424	52712	36521	46	395	695	1090
C. richardii	208082319	190903669	191760	130844	108289	57950	43	339	74	413
