# Supplementary material for: Origin and evolution of the nuclear auxin response system
Source: eLife journal article supplement (doi:10.7554/elife.33399), 2018-03-26
Supplement: supp [file elife-33399-supp-v1.zip › elife_poa_e33399_Figure_6_figure_supplement_1.pdf]

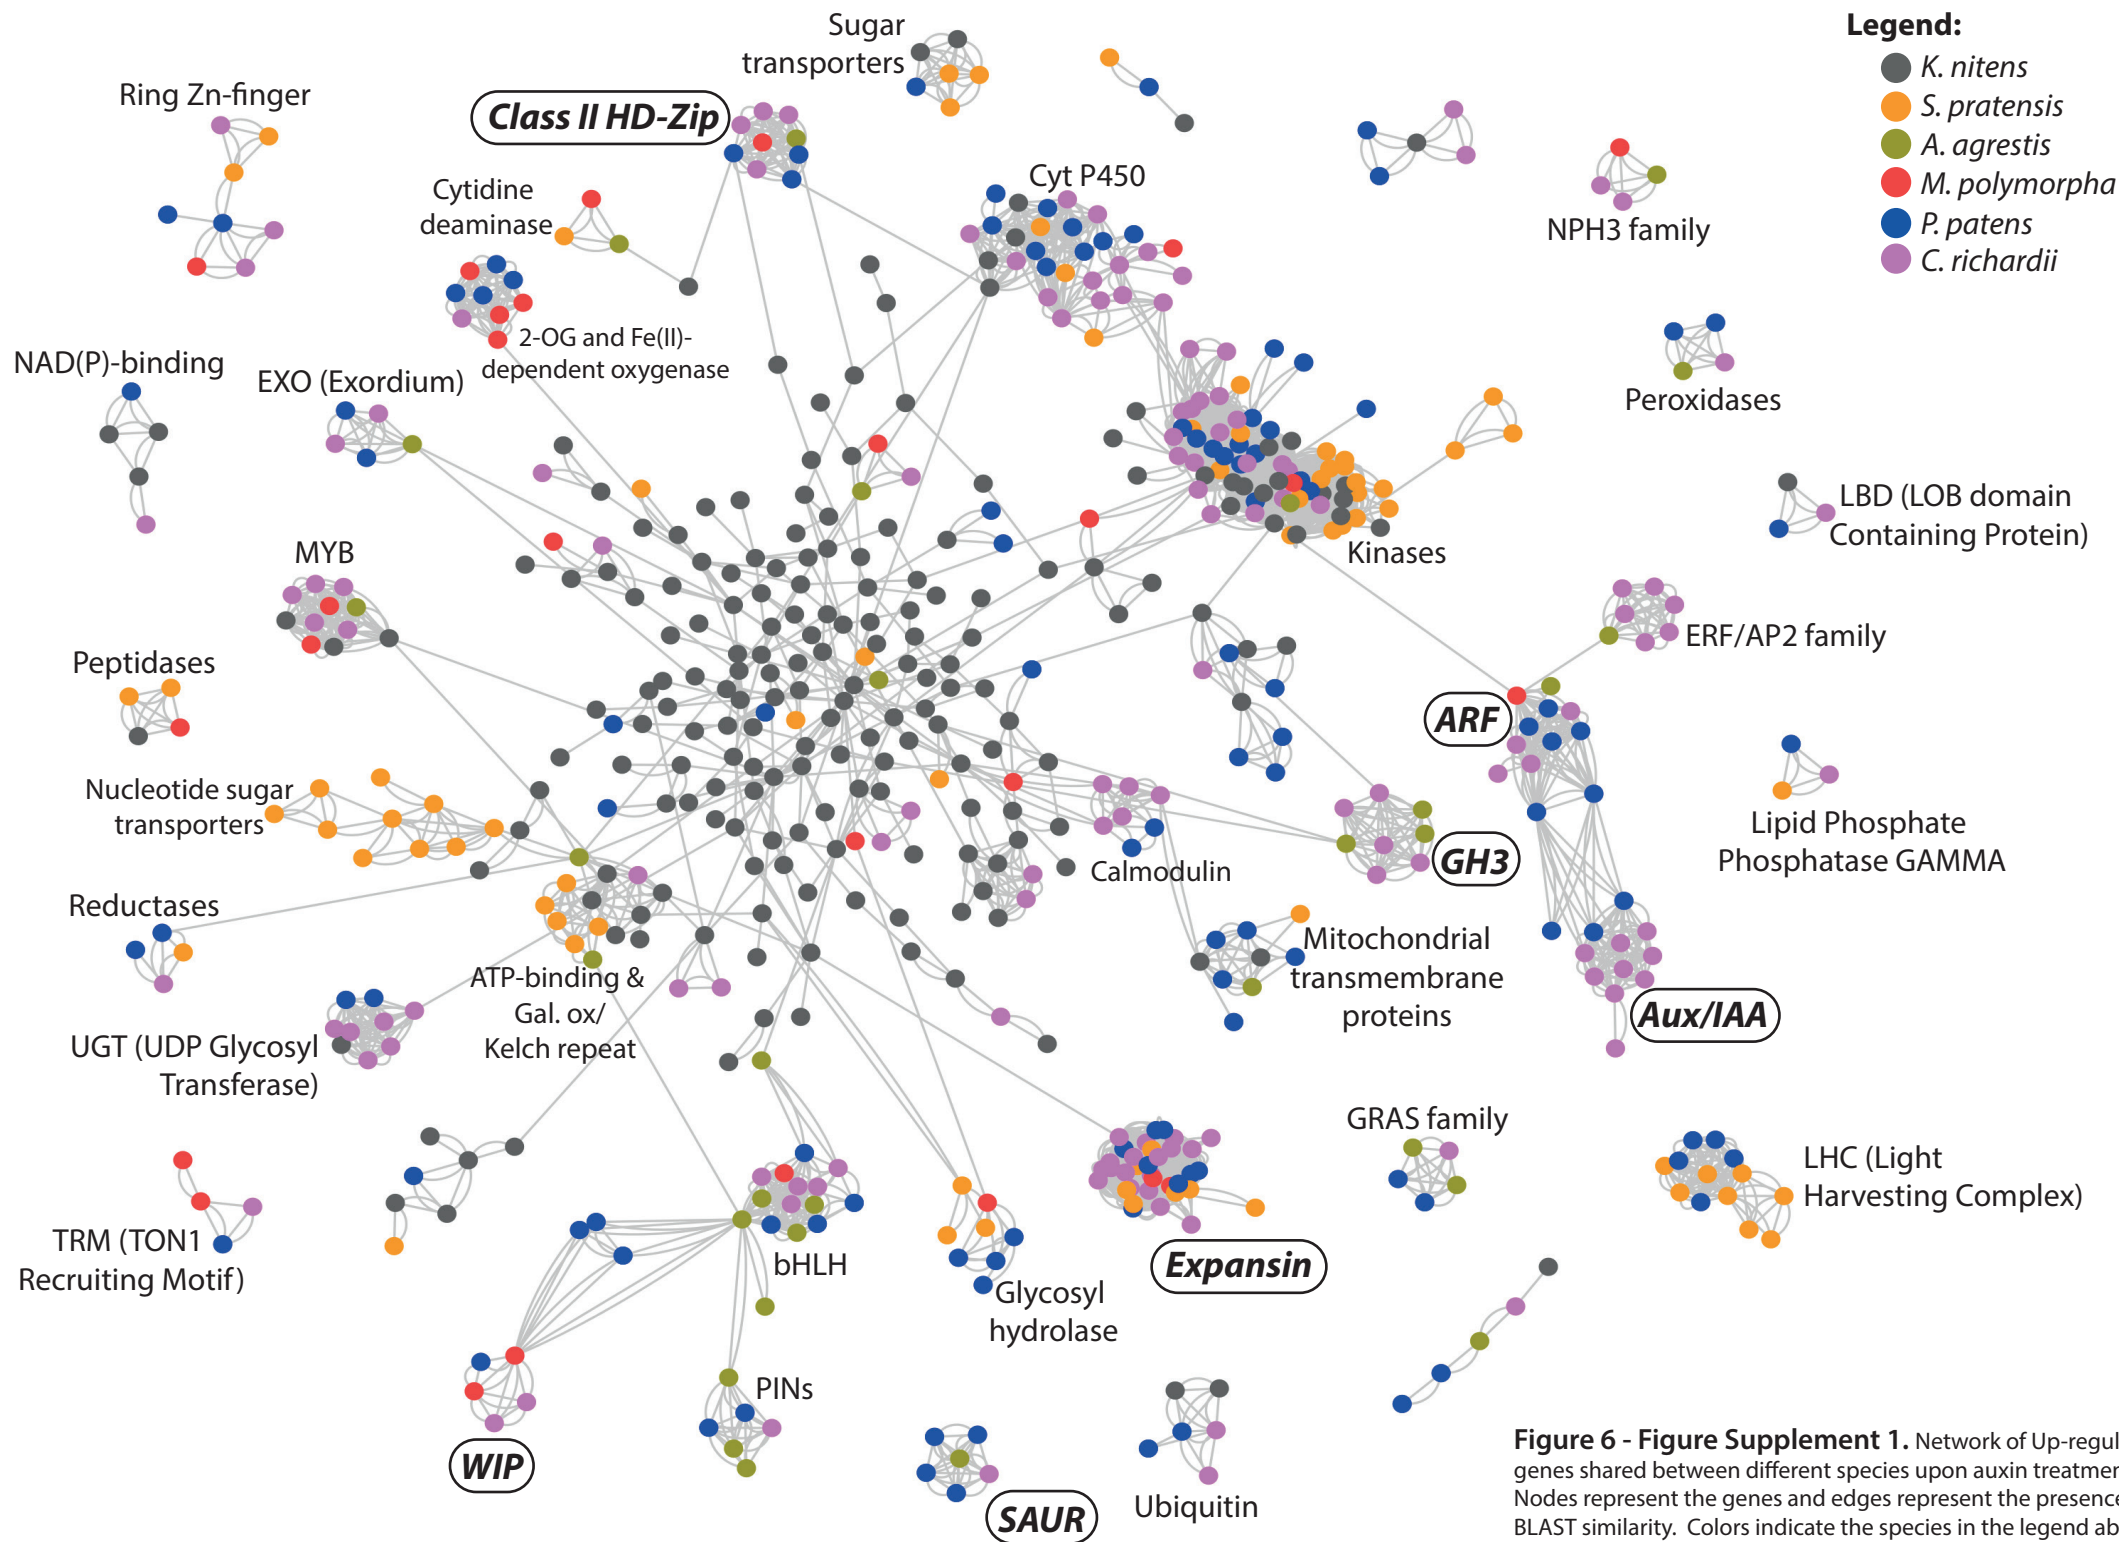

**Figure 6 - Figure Supplement 1.** Network of Up-regulated genes shared between different species upon auxin treatment. Nodes represent the genes and edges represent the presence of BLAST similarity. Colors indicate the species in the legend above.
