# Supplementary material for: Origin and evolution of the nuclear auxin response system
Source: eLife journal article supplement (doi:10.7554/elife.33399), 2018-03-26
Supplement: supp [file elife-33399-supp-v1.zip › elife_poa_e33399_Supplementary_File_1.xlsx]

## Sheet: 20150422_OneKP_SampleList
Table S1. Species used in phylogenomic analysis; Related to Figures 1 and 3
1kP_Sample	Clade	Order	Family	Species
URDJ	Basalmost angiosperms	Amborellales	Amborellaceae	Amborella trichopoda
WTKZ	Basalmost angiosperms	Nymphaeales	Nymphaeaceae	Nuphar advena
PZRT	Basalmost angiosperms	Nymphaeales	Nymphaeaceae	Nymphaea sp.
ROAP	Basalmost angiosperms	Austrobaileyales	Schisandraceae (incl. Illiciac.)	Illicium parviflorum
VZCI	Basalmost angiosperms	Austrobaileyales	Schisandraceae (incl. Illiciac.)	Illicium floridanum
NWMY	Basalmost angiosperms	Austrobaileyales	Schisandraceae (incl. Illiciac.)	Kadsura heteroclita
FZJL	Basalmost angiosperms	Austrobaileyales	Austrobaileyaceae	Austrobaileya scandens
NPND	Basalmost angiosperms	Ceratophyllales	Ceratophyllaceae	Ceratophyllum demersum
DDEV	Magnoliids	Canellales	Canellaceae	Canella winterana
IFCJ	Magnoliids	Canellales	Canellaceae	Canella winterana
WKSU	Magnoliids	Canellales	Winteraceae	Drimys winteri
WAIL	Magnoliids	Laurales	Atherospermataceae	Laurelia sempervirens
FALI	Magnoliids	Laurales	Calycanthaceae	Calycanthus floridus
WPHN	Magnoliids	Laurales	Calycanthaceae	Idiospermum australiense
MAQO	Magnoliids	Laurales	Gomortegaceae	Gomortega keule
BSVG	Magnoliids	Laurales	Hernandiaceae	Gyrocarpus americanus
BCGB	Magnoliids	Laurales	Lauraceae	Cinnamomum camphora
ABSS	Magnoliids	Laurales	Lauraceae	Sassafras albidum
KAYP	Magnoliids	Laurales	Lauraceae	Lindera benzoin
WIGA	Magnoliids	Laurales	Lauraceae	Persea borbonia
VYLQ	Magnoliids	Laurales	Lauraceae	Cassytha filiformis
KRJP	Magnoliids	Laurales	Monimiaceae	Peumus boldus
YZRI	Magnoliids	Magnoliales	Annonaceae	Annona muricata
PSJT	Magnoliids	Magnoliales	Annonaceae	Uvaria microcarpa
DHPO	Magnoliids	Magnoliales	Eupomatiaceae	Eupomatia bennettii
XQWC	Magnoliids	Magnoliales	Magnoliaceae	Michelia maudiae
WBOD	Magnoliids	Magnoliales	Magnoliaceae	Magnolia grandiflora
OBPL	Magnoliids	Magnoliales	Myristicaceae	Myristica fragrans
PAWA	Magnoliids	Piperales	Aristolochiaceae	Aristolochia elegans
QDVW	Magnoliids	Piperales	Aristolochiaceae	Saruma henryi
MUNP	Magnoliids	Piperales	Piperaceae	Piper auritum
XSZI	Magnoliids	Piperales	Piperaceae	Peperomia fraseri
OPDF	Magnoliids	Piperales	Saururaceae	Saururus cernuus
CSSK	Magnoliids	Piperales	Saururaceae	Houttuynia cordata
WPYJ	Magnoliids	Violales	Frankeniaceae	Frankenia laevis
OSHQ	Chloranthales	Chloranthales	Chloranthaceae	Sarcandra glabra
WZFE	Chloranthales	Chloranthales	Chloranthaceae	Ascarina rubricaulis
AALA	Basal Eudicots	Sabiales	Sabiaceae	Meliosma cuneifolia
OBOJ	Basal Eudicots	Proteales	Proteaceae	Hakea prostrata
YDEH	Basal Eudicots	Ranunculales	Papaveraceae	Argemone mexicana
BMRX	Basal Eudicots	Ranunculales	Papaveraceae	Papaver somniferum
EHNF	Basal Eudicots	Dilleniales	Dilleniaceae	Dillenia indica
KTQI	Core Eudicots	Caryophyllales	Amaranthaceae	Alternanthera brasiliana
CPLT	Core Eudicots	Caryophyllales	Portulacaceae	Portulaca grandiflora
RSPO	Core Eudicots	Santalales	Santalaceae	Santalum acuminatum
YHXT	Core Eudicots	Saxifragales	Hamamelidaceae	Hamamelis virginiana
FCBJ	Core Eudicots	Saxifragales	Saxifragaceae	Saxifraga stolonifera
EBPG	Core Eudicots/Rosids	Myrtales	Onagraceae	Oenothera grandiflora
TTRG	Core Eudicots/Rosids	Fabales	Fabaceae	Lupinus angustifolius
AXPJ	Core Eudicots/Rosids	Malpighiales	Linaceae	Linum flavum
TJQY	Core Eudicots/Rosids	Rosales	Rosaceae	Kerria japonica
VCCF	Core Eudicots/Rosids	Sapindales	Meliaceae	Melia azedarach
ABEH	Core Eudicots/Asterids	incertae sedis	Boraginaceae	Heliotropium greggii
TAGM	Core Eudicots/Asterids	Lamiales	Lamiaceae	Melissa officinalis
OQBM	Core Eudicots/Asterids	Solanales	Convolvulaceae	Ipomoea indica
XRCX	Core Eudicots/Asterids	Asterales	Asteraceae	Aster tataricus
HRVY	Core Eudicots/Asterids	Asterales	Asteraceae	Flaveria trinervia
COCP	Monocots	Alismatales	Juncaginaceae	Triglochin maritima
OVRB	Monocots	Liliales	Colchicaceae	Colchicum autumnale
THEW	Monocots	Liliales	Liliaceae	Lilium sargentiae
KBXS	Monocots	Asparagales	Alliaceae	Allium commutatum
MTHW	Monocots	Asparagales	Orchidaceae	Platanthera clavellata
RQZP	Monocots	Asparagales	Ruscaceae	Nolina bigelovii
QGLJ	Monocots/Commelinids	Arecales	Arecaceae	Cocos nucifera
JQCX	Monocots/Commelinids	Zingiberales	Zingiberaceae	Curcuma longa
HATH	Monocots/Commelinids	Poales	Poaceae	Aristida stricta
PPQR	Monocots/Commelinids	Poales	Typhaceae	Typha angustifolia
SGTW	Ginkgoales	Ginkgoales	Ginkgoaceae	Ginkgo biloba
VDAO	Gnetales	Ephedrales	Ephedraceae	Ephedra sinica
GTHK	Gnetales	Gnetales	Gnetaceae	Gnetum montanum
TOXE	Gnetales	Gnetales	Welwitschiaceae	Welwitschia mirabilis
XZUY	Cycadales	Cycadales	Cycadaceae	Cycas micholitzii
KAWQ	Cycadales	Cycadales	Stangeriaceae	Stangeria eriopus
WLIC	Cycadales	Cycadales	Zamiaceae	Dioon edule
GNQG	Cycadales	Cycadales	Zamiaceae	Encephalartos barteri
MIXZ	Conifers	Pinales	Araucariaceae	Agathis robusta
ACWS	Conifers	Pinales	Araucariaceae	Araucaria sp.
RSCE	Conifers	Pinales	Araucariaceae	Wollemia nobilis
WYAJ	Conifers	Pinales	Cephalotaxaceae	Cephalotaxus harringtonia
GJTI	Conifers	Pinales	Cephalotaxaceae	Cephalotaxus harringtonia
RMMV	Conifers	Pinales	Cupressaceae	Callitris macleayana
HOUF	Conifers	Pinales	Cupressaceae	Cryptomeria japonica
NRXL	Conifers	Pinales	Cupressaceae	Metasequoia glyptostroboides
BUWV	Conifers	Pinales	Cupressaceae	Platycladus orientalis
CGDN	Conifers	Pinales	Cupressaceae	Tetraclinis sp.
AUDE	Conifers	Pinales	Cupressaceae	Widdringtonia cedarbergensis
VSRH	Conifers	Pinales	Pinaceae	Abies lasiocarpa
WVWN	Conifers	Pinales	Pinaceae	Larix speciosa
IIOL	Conifers	Pinales	Pinaceae	Pinus parviflora
DZQM	Conifers	Pinales	Pinaceae	Pinus radiata
FMWZ	Conifers	Pinales	Podocarpaceae	Dacrycarpus compactus
QHBI	Conifers	Pinales	Podocarpaceae	Falcatifolium taxoides
CDFR	Conifers	Pinales	Podocarpaceae	Manoao colensoi
SCEB	Conifers	Pinales	Podocarpaceae	Podocarpus coriaceus
WWSS	Conifers	Pinales	Taxaceae	Taxus baccata
GAON	Lycophytes	Lycopodiales	Lycopodiaceae	Huperzia squarrosa
GKAG	Lycophytes	Lycopodiales	Lycopodiaceae	Huperzia lucidula
NYBX	Lycophytes	Lycopodiales	Lycopodiaceae	Huperzia selago
CBAE	Lycophytes	Lycopodiales	Huperziaceae	Huperzia myrsinites
ZZEI	Lycophytes	Lycopodiales	Huperziaceae	Phylloglossum drummondii
GTUO	Lycophytes	Lycopodiales	Huperziaceae	Huperzia selago
ULKT	Lycophytes	Lycopodiales	Lycopodiaceae	Lycopodiella appressa
PQTO	Lycophytes	Lycopodiales	Lycopodiaceae	Lycopodium deuterodensum
ENQF	Lycophytes	Lycopodiales	Lycopodiaceae	Lycopodium annotinum
UPMJ	Lycophytes	Lycopodiales	Lycopodiaceae	Pseudolycopodiella caroliniana
XNXF	Lycophytes	Lycopodiales	Lycopodiaceae	Dendrolycopodium obscurum
WAFT	Lycophytes	Lycopodiales	Lycopodiaceae	Diphasiastrum digitatum
PKOX	Lycophytes	Isoetales	Isoetaceae	Isoetes tegetiformans
PYHZ	Lycophytes	Isoetales	Isoetaceae	Isoetes sp.
LGDQ	Lycophytes	Selaginellales	Selaginellaceae	Selaginella apoda
JKAA	Lycophytes	Selaginellales	Selaginellaceae	Selaginella wallacei
ABIJ	Lycophytes	Selaginellales	Selaginellaceae	Selaginella lepidophylla
ZYCD	Lycophytes	Selaginellales	Selaginellaceae	Selaginella acanthonota
ZZOL	Lycophytes	Selaginellales	Selaginellaceae	Selaginella stauntoniana
KUXM	Lycophytes	Selaginellales	Selaginellaceae	Selaginella selaginoides
ZFGK	Lycophytes	Selaginellales	Selaginellaceae	Selaginella kraussiana
KJYC	Lycophytes	Selaginellales	Selaginellaceae	Selaginella willdenowii
JVSZ	Eusporangiate Monilophytes	Equisetales	Equisetaceae	Equisetum hyemale
UXCS	Eusporangiate Monilophytes	Marattiales	Marattiaceae	Marattia sp.
WTJG	Eusporangiate Monilophytes	Ophioglossales	Ophioglossaceae	Ophioglossum petiolatum
QVMR	Eusporangiate Monilophytes	Psilotales	Psilotaceae	Psilotum nudum
PNZO	Leptosporangiate Monilophytes	Cyatheales	Culcitaceae	Culcita macrocarpa
GANB	Leptosporangiate Monilophytes	Cyatheales	Cyatheaceae	Cyathea (Alsophila) spinulosa
EWXK	Leptosporangiate Monilophytes	Cyatheales	Thyrsopteridaceae	Thyrsopteris elegans
XDVM	Leptosporangiate Monilophytes	Gleicheniales	Gleicheniaceae	Sticherus lobatus
MEKP	Leptosporangiate Monilophytes	Gleicheniales	Dipteridaceae	Dipteris conjugata
TWFZ	Leptosporangiate Monilophytes	Hymenophyllales	Hymenophyllaceae	Crepidomanes venosum
QIAD	Leptosporangiate Monilophytes	Hymenophyllales	Hymenophyllaceae	Hymenophyllum bivalve
TRPJ	Leptosporangiate Monilophytes	Hymenophyllales	Hymenophyllaceae	Hymenophyllum cupressiforme
BIVQ	Leptosporangiate Monilophytes	Osmundales	Osmundaceae	Osmundastrum cinnamomeum
YKSS	Leptosporangiate Monilophytes	Osmundales	Osmundaceae	Osmunda regalis
UOMY	Leptosporangiate Monilophytes	Osmundales	Osmundaceae	Osmunda sp.
VIBO	Leptosporangiate Monilophytes	Osmundales	Osmundaceae	Osmunda javanica
UWOD	Leptosporangiate Monilophytes	Plagiogyriales	Plagiogyriaceae	Plagiogyria japonica
IXLH	Leptosporangiate Monilophytes	Polypodiales	Polypodiaceae	Polypodium hesperium
GYFU	Leptosporangiate Monilophytes	Polypodiales	Polypodiaceae	Polypodium hesperium
YLJA	Leptosporangiate Monilophytes	Polypodiales	Polypodiaceae	Polypodium amorphum
CJNT	Leptosporangiate Monilophytes	Polypodiales	Polypodiaceae	Polypodium glycyrrhiza
ZQYU	Leptosporangiate Monilophytes	Polypodiales	Polypodiaceae	Phlebodium pseudoaureum
UJWU	Leptosporangiate Monilophytes	Polypodiales	Polypodiaceae	Pleopeltis polypodioides
ORJE	Leptosporangiate Monilophytes	Polypodiales	Polypodiaceae	Phymatosorus grossus
OQWW	Leptosporangiate Monilophytes	Polypodiales	Davalliaceae	Davallia fejeensis
NWWI	Leptosporangiate Monilophytes	Polypodiales	Lomariopsidaceae	Nephrolepis exaltata
JBLI	Leptosporangiate Monilophytes	Polypodiales	Elaphoglossaceae	Bolbitis repanda
FQGQ	Leptosporangiate Monilophytes	Polypodiales	Dryopteridaceae	Polystichum acrostichoides
RFRB	Leptosporangiate Monilophytes	Polypodiales	Hypodematiaceae	Didymochlaena truncatula
WGTU	Leptosporangiate Monilophytes	Polypodiales	Hypodematiaceae	Leucostegia immersa
PSKY	Leptosporangiate Monilophytes	Polypodiales	Aspleniaceae	Asplenium nidus
KJZG	Leptosporangiate Monilophytes	Polypodiales	Aspleniaceae	Asplenium platyneuron
OCZL	Leptosporangiate Monilophytes	Polypodiales	Diplaziopsidaceae	Homalosorus pycnocarpos
MROH	Leptosporangiate Monilophytes	Polypodiales	Thelypteridaceae	Thelypteris acuminata
YJJY	Leptosporangiate Monilophytes	Polypodiales	Woodsiaceae	Woodsia scopulina
YQEC	Leptosporangiate Monilophytes	Polypodiales	Woodsiaceae	Woodsia ilvensis
HTFH	Leptosporangiate Monilophytes	Polypodiales	Onocleaceae	Onoclea sensibilis
VITX	Leptosporangiate Monilophytes	Polypodiales	Blechnaceae	Blechnum spicant
AFPO	Leptosporangiate Monilophytes	Polypodiales	Athyriaceae	Athyrium sp.
URCP	Leptosporangiate Monilophytes	Polypodiales	Athyriaceae	Athyrium filix-femina
FCHS	Leptosporangiate Monilophytes	Polypodiales	Athyriaceae	Deparia lobato-crenata
UFJN	Leptosporangiate Monilophytes	Polypodiales	Athyriaceae	Diplazium wichurae
HNDZ	Leptosporangiate Monilophytes	Polypodiales	Cystopteridaceae	Cystopteris utahensis
LHLE	Leptosporangiate Monilophytes	Polypodiales	Cystopteridaceae	Cystopteris fragilis
XXHP	Leptosporangiate Monilophytes	Polypodiales	Cystopteridaceae	Cystopteris fragilis
RICC	Leptosporangiate Monilophytes	Polypodiales	Cystopteridaceae	Cystopteris reevesiana
YOWV	Leptosporangiate Monilophytes	Polypodiales	Cystopteridaceae	Cystopteris protrusa
HEGQ	Leptosporangiate Monilophytes	Polypodiales	Cystopteridaceae	Gymnocarpium dryopteris
MTGC	Leptosporangiate Monilophytes	Polypodiales	Dennstaedtiaceae	Dennstaedtia davallioides
WCLG	Leptosporangiate Monilophytes	Polypodiales	Pteridaceae	Adiantum aleuticum
BMJR	Leptosporangiate Monilophytes	Polypodiales	Pteridaceae	Adiantum raddianum
DCDT	Leptosporangiate Monilophytes	Polypodiales	Pteridaceae	Gaga arizonica
WQML	Leptosporangiate Monilophytes	Polypodiales	Pteridaceae	Cryptogramma acrostichoides
ZXJO	Leptosporangiate Monilophytes	Polypodiales	Pteridaceae	Parahemionitis cordata
POPJ	Leptosporangiate Monilophytes	Polypodiales	Pteridaceae	Pteris vittata
FLTD	Leptosporangiate Monilophytes	Polypodiales	Pteridaceae	Pteris ensiformis
UJTT	Leptosporangiate Monilophytes	Polypodiales	Pteridaceae	Pityrogramma trifoliata
YCKE	Leptosporangiate Monilophytes	Polypodiales	Pteridaceae	Notholaena montieliae
XDDT	Leptosporangiate Monilophytes	Polypodiales	Pteridaceae	Argyrochosma nivea
GSXD	Leptosporangiate Monilophytes	Polypodiales	Pteridaceae	Myriopteris rufa
SKYV	Leptosporangiate Monilophytes	Polypodiales	Pteridaceae	Vittaria lineata
NDUV	Leptosporangiate Monilophytes	Polypodiales	Pteridaceae	Vittaria appalachiana
NOKI	Leptosporangiate Monilophytes	Polypodiales	Lindsaeaceae	Lindsaea linearis
YIXP	Leptosporangiate Monilophytes	Polypodiales	Lindsaeaceae	Lindsaea microphylla
CVEG	Leptosporangiate Monilophytes	Salviniales	Salviniaceae	Azolla cf. caroliniana
KIIX	Leptosporangiate Monilophytes	Salviniales	Marsileaceae	Pilularia globulifera
CQPW	Leptosporangiate Monilophytes	Schizaeales	Anemiaceae	Anemia tomentosa
PBUU	Leptosporangiate Monilophytes	Schizaeales	Lygodiaceae	Lygodium japonicum
WOGB	Mosses	Andreaeales	Andreaeaceae	Andreaea rupestris
ORKS	Mosses	Bartramiales	Bartramiaceae	Philonotis fontana
BGXB	Mosses	Bryales	Mielichhoferiaceae	Plagiomnium insigne
JMXW	Mosses	Bryales	Bryaceae	Bryum argenteum
WNGH	Mosses	Bryales	Aulacomniaceae	Aulacomnium heterostichum
VBMM	Mosses	Leucodontales	Brachytheciaceae	Claopodium rostratum
QMWB	Mosses	Leucodontales	Myuriaceae	Anomodon attenuatus
ABCD	Mosses	Grimmiales	Grimmiaceae	Racomitrium elongatum
RDOO	Mosses	Grimmiales	Grimmiaceae	Racomitrium varium
BPSG	Mosses	Grimmiales	Scouleriaceae	Scouleria aquatica
HRWG	Mosses	Buxbaumiales	Buxbaumiaceae	Buxbaumia aphylla
NGTD	Mosses	Dicranales	Dicranaceae	Dicranum scoparium
VMXJ	Mosses	Dicranales	Leucobryaceae	Leucobryum albidum
RGKI	Mosses	Dicranales	Leucobryaceae	Leucobryum glaucum
FFPD	Mosses	Dicranales	Ditrichaceae	Ceratodon purpureus
AWOI	Mosses	Diphysciales	Diphysciaceae	Diphyscium foliosum
KEFD	Mosses	Encalyptales	Encalyptaceae	Encalypta streptocarpa
XWHK	Mosses	Funariales	Bryaceae	Rosulabryum cf. capillare
YEPO	Mosses	Funariales	Funariaceae	Physcomitrium sp.
YWNF	Mosses	Hedwigiales	Hedwigiaceae	Hedwigia ciliata
WSPM	Mosses	Hypnales	Hylocomiaceae	Loeskeobryum brevirostre
ZACW	Mosses	Hypnales	Leucodontaceae	Leucodon brachypus
LNSF	Mosses	Hypnales	Pylaisiaceae	Stereodon subimponens
QKQO	Mosses	Hypnales	Plagiotheciaceae	Pseudotaxiphyllum elegans
EEMJ	Mosses	Hypnales	Thuidiaceae	Thuidium delicatulum
JADL	Mosses	Hypnales	Brachytheciaceae	Rhynchostegium serrulatum
IGUH	Mosses	Hypnales	Leucodontaceae	Leucodon julaceus
TAVP	Mosses	Hypnales	Calliergonaceae	Calliergon cordifolium
MIRS	Mosses	Hypnales	Climaciaceae	Climacium dendroides
DHWX	Mosses	Hypnales	Fontinalaceae	Fontinalis antipyretica
TMAJ	Mosses	Hypnales	Neckeraceae	Neckera douglasii
CMEQ	Mosses	Orthotrichales	Orthotrichaceae	Orthotrichum lyellii
SZYG	Mosses	Polytrichales	Polytrichaceae	Polytrichum commune
ZTHV	Mosses	Polytrichales	Polytrichaceae	Atrichum angustatum
GRKU	Mosses	Pottiales	Pottiaceae	Syntrichia princeps
GOWD	Mosses	Sphagnales	Sphagnaceae	Sphagnum lescurii
RCBT	Mosses	Sphagnales	Sphagnaceae	Sphagnum palustre
UHLI	Mosses	Sphagnales	Sphagnaceae	Sphagnum recurvum
SKQD	Mosses	Takakiales	Takakiaceae	Takakia lepidozioides
HVBQ	Mosses	Tetraphidales	Tetraphidaceae	Tetraphis pellucida
ZQRI	Mosses	Timmiales	Timmiaceae	Timmia austriaca
FANS	Hornworts	Leiosporocerotales	Leiosporocerotaceae	Leiosporoceros dussii
IQJU	Hornworts	Anthocerotales	Anthoceroceae	Anthoceros formosae
FAJB	Hornworts	Anthocerotales	Notothyladaceae	Paraphymatoceros hallii
WCZB	Hornworts	Notothyladales	Notothyladaceae	Phaeoceros carolinianus
RXRQ	Hornworts	Notothyladales	Notothyladaceae	Phaeoceros carolinianus
DXOU	Hornworts	Dendrocerotales	Dendrocerotaceae	Nothoceros aenigmaticus
TCBC	Hornworts	Dendrocerotales	Dendrocerotaceae	Nothoceros vincentianus
UCRN	Hornworts	Dendrocerotales	Dendrocerotaceae	Megaceros flagellaris
AEXY	Liverworts	Blasiales	Blasiaceae	Blasia sp.
YBQN	Liverworts	Jungermanniales	Cephaloziaceae	Odontoschisma prostratum
WZYK	Liverworts	Jungermanniales	Lepidoziaceae	Bazzania trilobata
RTMU	Liverworts	Jungermanniales	Calypogeiaceae	Calypogeia fissa
CHJJ	Liverworts	Jungermanniales	Frullaniaceae	Frullania spp.
IRBN	Liverworts	Jungermanniales	Scapaniaceae	Scapania nemorosa
OFTV	Liverworts	Jungermanniales	Scapaniaceae	Barbilophozia barbata
NWQC	Liverworts	Jungermanniales	Plagiochilaceae/Fissidentaceae	mixed species
HPXA	Liverworts	Jungermanniales	Ptilidiaceae	Ptilidium pulcherrimum
LGOW	Liverworts	Jungermanniales	Schistochilaceae	Schistochila sp.
UUHD	Liverworts	Jungermanniales	Porellaceae	Porella pinnata
TGKW	Liverworts	Jungermanniales	Frullaniaceae	Frullania sp.
JPYU	Liverworts	Marchantiales	Marchantiaceae	Marchantia polymorpha
TFYI	Liverworts	Marchantiales	Marchantiaceae	Marchantia emarginata
HMHL	Liverworts	Marchantiales	Marchantiaceae	Marchantia paleacea
IHWO	Liverworts	Marchantiales	Marchantiaceae	Marchantia paleacea
ILBQ	Liverworts	Marchantiales	Conocephalaceae	Conocephalum conicum
TXVB	Liverworts	Marchantiales	Lunulariaceae	Lunularia cruciata
TFDQ	Liverworts	Marchantiales	Monocleaceae	Monoclea gottschei
WJLO	Liverworts	Marchantiales	Ricciaceae	Ricciocarpos natans
NRWZ	Liverworts	Metzgeriales	Metzgeriaceae	Metzgeria crassipilis
YFGP	Liverworts	Pallaviciniales	Pallaviciniaceae	Pallavicinia lyellii
PIUF	Liverworts	Pelliales	Pelliaceae	Pellia sp. (cf epiphylla (L.) Corda)
JHFI	Liverworts	Pelliales	Pelliaceae	Pellia neesiana
KRUQ	Liverworts	Porellales	Porellaceae	Porella navicularis
BNCU	Liverworts	Porellales	Radulaceae	Radula lindenbergiana
HERT	Liverworts	Sphaerocarpales	Sphaerocarpaceae	Sphaerocarpos texanus
FITN	Liverworts	Treubiales	Treubiaceae	Treubia lacunosa
XMCL	Green Algae	Prasinococcales	Prasinococcaceae	Prasinococcus capsulatus
XJGM	Green Algae	Prasinococcales	Prasinococcaceae	coccoid-prasinophyte
HYHN	Green Algae	Prasinococcales	Prasinococcaceae	Prasinoderma coloniale
MXEZ	Green Algae	Pseudoscourfieldiales	Pycnococcaceae	Pycnococcus provasolii
JMTE	Green Algae	Pseudoscourfieldiales	Pycnococcaceae	Pseudoscourfieldia marina
TNAW	Green Algae	Pyramimonadales	Pyramimonadaceae	Pyramimonas parkeae
XIVI	Green Algae	Pyramimonadales	Pyramimonadaceae	Cymbomonas sp.
AYPS	Green Algae	incertae sedis	incertae sedis	unidentified species
MCPK	Green Algae	Mamiellales	Mamiellaceae	Bathycoccus prasinos
QXSZ	Green Algae	Mamiellales	Mamiellaceae	Mantoniella squamata
BTFM	Green Algae	Mamiellales	Monomasticaceae	Monomastix opisthostigma
XOAL	Green Algae	Dolichomastigales	Dolichomastigaceae	Dolichomastix tenuilepis
MMKU	Green Algae	Nephroselmidales	Nephroselmidaceae	Nephroselmis olivacea
ISIM	Green Algae	Nephroselmidales	Nephroselmidaceae	Nephroselmis pyriformis
FMVB	Green Algae	Chlorodendrales	Chlorodendraceae	Scherffelia dubia
HVNO	Green Algae	Chlorodendrales	Chlorodendraceae	Tetraselmis chui
DUMA	Green Algae	Chlorodendrales	Chlorodendraceae	Tetraselmis cordiformis
HHXJ	Green Algae	Chlorodendrales	Chlorodendraceae	Tetraselmis striata
BAZF	Green Algae	Chaetopeltidales	Chaetopeltidaceae	Chaetopeltis orbicularis
VFIV	Green Algae	Chaetophorales	Chaetophoraceae	Fritschiella tuberosa
AJAU	Green Algae	Chaetophorales	Chaetophoraceae	Helicodictyon planctonicum
NQYP	Green Algae	Chaetophorales	Chaetophoraceae	Pirula salina
JMUI	Green Algae	Chaetophorales	Chaetophoraceae	Stigeoclonium helveticum
RAWF	Green Algae	Chaetophorales	Chaetophoraceae	Uronema belkae
ISGT	Green Algae	Chaetophorales	Chaetophoraceae	Uronema sp.
IJMT	Green Algae	Chaetophorales	Aphanochaetaceae	Aphanochaete repens
GXBM	Green Algae	Chlorococcales	Coccomyxaceae	Coccomyxa pringsheimii
BZSH	Green Algae	Chlorococcales	Golenkiniaceae	Golenkinia longispicula
XKWQ	Green Algae	Chlorococcales	Hydrodictyaceae	Pediastrum duplex CCAC 0012
NLOM	Green Algae	Chlorococcales	Hydrodictyaceae	Pediastrum duplex CCAC 0012
XTON	Green Algae	Chlorococcales	Hydrodictyaceae	Pediastrum duplex CCAC 0147
PZIF	Green Algae	Chlorococcales	Scenedesmaceae	Scenedesmus dimorphus
ALZF	Green Algae	Chlorocystidales	Chlorocystidaceae	Halochlorococcum marinum
USIX	Green Algae	Chlorosarcinales	Chlorosarcinaceae	Neochlorosarcina sp.
FOYQ	Green Algae	Microsporales	Microsporaceae	Microspora cf. tumidula
DVYE	Green Algae	Oedogoniales	Oedogoniaceae	Oedogonium cardiacum
SDPC	Green Algae	Oedogoniales	Oedogoniaceae	Oedogonium foveolatum
KUJU	Green Algae	Volvocales	Goniaceae	Gonium pectorale
EEJO	Green Algae	Volvocales	incertae sedis	Neochloris oleoabundans
KSFK	Green Algae	Sphaeropleales	Chlorosarcinaceae	Chlorosarcinopsis halophila
GJIY	Green Algae	Sphaeropleales	Neochloridaceae	Neochloris sp.
OTQG	Green Algae	Sphaeropleales	Ankistrodesmaceae	Ankistrodesmus sp.
JWGT	Green Algae	Volvocales	Volvocaceae	Volvox aureus
WRSL	Green Algae	Volvocales	Volvocaceae	Volvox aureus
ISPU	Green Algae	Volvocales	Volvocaceae	Volvox globator
RNAT	Green Algae	Volvocales	Volvocaceae	Eudorina elegans
RYJX	Green Algae	Volvocales	Volvocaceae	Pandorina morum
NTLE	Green Algae	Volvocales	Asteromonadaceae	Asteromonas gracilis
MNPL	Green Algae	Volvocales	Asteromonadaceae	Asteromonas gracilis
VIAU	Green Algae	Volvocales	Carteriaceae	Carteria crucifera
RUIF	Green Algae	Volvocales	Carteriaceae	Carteria obtusa
MULF	Green Algae	Volvocales	Chlamydomonadaceae	Chlamydomonas bilatus
OVHR	Green Algae	Volvocales	Chlamydomonadaceae	Chlamydomonas bilatus
BCYF	Green Algae	Volvocales	Chlamydomonadaceae	Chlamydomonas cribrum
JRGZ	Green Algae	Volvocales	Chlamydomonadaceae	Chlamydomonas moewusii
VALZ	Green Algae	Volvocales	Chlamydomonadaceae	Chlamydomonas noctigama
TSBQ	Green Algae	Volvocales	Chlamydomonadaceae	Chlamydomonas sp.
AOUJ	Green Algae	Volvocales	Chlamydomonadaceae	Chlamydomonas sp.
GUBD	Green Algae	Volvocales	Chlamydomonadaceae	Brachiomonas submarina
IHOI	Green Algae	Volvocales	Chlamydomonadaceae	Chloromonas oogama
QRTH	Green Algae	Volvocales	Chlamydomonadaceae	Chloromonas perforata
LBRP	Green Algae	Volvocales	Chlamydomonadaceae	Chloromonas reticulata
GDUD	Green Algae	Volvocales	Chlamydomonadaceae	Chloromonas reticulata
AJUW	Green Algae	Volvocales	Chlamydomonadaceae	Chloromonas rosae
GFUR	Green Algae	Volvocales	Chlamydomonadaceae	Chloromonas subdivisa
UTRE	Green Algae	Volvocales	Chlamydomonadaceae	Chloromonas tughillensis
IRYH	Green Algae	Volvocales	Chlamydomonadaceae	Heterochlamydomonas inaequalis
OFUE	Green Algae	Volvocales	Chlamydomonadaceae	Lobochlamys segnis
JKKI	Green Algae	Volvocales	Chlamydomonadaceae	Lobomonas rostrata
XDLL	Green Algae	Volvocales	Chlamydomonadaceae	Oogamochlamys gigantea
MXDS	Green Algae	Volvocales	Chlamydomonadaceae	Spermatozopsis exsultans
ENAU	Green Algae	Volvocales	Chlamydomonadaceae	Spermatozopsis similis
QWRA	Green Algae	Volvocales	Chlamydomonadaceae	Vitreochlamys sp.
WDWX	Green Algae	Volvocales	Dunaliellaceae	Dunaliella primolecta
RHVC	Green Algae	Volvocales	Dunaliellaceae	Dunaliella salina
SYJM	Green Algae	Volvocales	Dunaliellaceae	Dunaliella salina
UKUC	Green Algae	Volvocales	Dunaliellaceae	Dunaliella salina
ZDIZ	Green Algae	Volvocales	Dunaliellaceae	Dunaliella tertiolecta
FXHG	Green Algae	Volvocales	Dunaliellaceae	Hafniomonas reticulata
ODXI	Green Algae	Volvocales	Haematococcaceae	Haematococcus pluvialis
AGIO	Green Algae	Volvocales	Haematococcaceae	Haematococcus pluvialis
ZLQE	Green Algae	Volvocales	Haematococcaceae	Stephanosphaera pluvialis
ZIVZ	Green Algae	Volvocales	Phacotaceae	Phacotus lenticularis
LNIL	Green Algae	Volvocales	Phacotaceae	Pteromonas angulosa
ACRY	Green Algae	Volvocales	Phacotaceae	Pteromonas sp.
NKXU	Green Algae	Trebouxiales	Trebouxiaceae	Trebouxia arboricola
ETGN	Green Algae	Trebouxiales	Botryococcaceae	Botryococcus braunii
VJDZ	Green Algae	Trebouxiales	Botryococcaceae	Botryococcus sudeticus
QYXY	Green Algae	Trebouxiales	Botryococcaceae	Botryococcus terribilis
MWAN	Green Algae	Chlorellales	Chlorellaceae	Chlorella minutissima
PFUD	Green Algae	Chlorellales	Chlorellaceae	Geminella sp.
MFYC	Green Algae	Chlorellales	Chlorellaceae	Nannochloris atomus
AKCR	Green Algae	Chlorellales	Chlorellaceae	Parachlorella kessleri
BILC	Green Algae	Chlorellales	Chlorellaceae	Prototheca wickerhamii
ZNUM	Green Algae	Chlorellales	Leptosiraceae	Leptosira obovata
MNCB	Green Algae	Chlorellales	Oocystaceae	Eremosphaera viridis
DXNY	Green Algae	Microthamniales	Microthamniaceae	Microthamnion kuetzingianum
ZDOF	Green Algae	Microthamniales	Microthamniaceae	Microthamnion kuetzingianum
WCLV	Green Algae	Prasiolales	Prasiolaceae	Prasiola crispa
WXRI	Green Algae	Prasiolales	Prasiolaceae	Stichococcus bacillaris
CQQP	Green Algae	Ulvales	Ulvaceae	Ochlochaete sp.
OAEZ	Green Algae	Ulvales	Ulvaceae	Percursaria percursa
LSHT	Green Algae	Ulvales	Bolbocoleonaceae	Bolbocoleon piliferum
PZBH	Green Algae	Oltmannsiellopsidaceae	Oltmannsiellopsidaceae	Oltmannsiellopsis viridis
QJYX	Green Algae	Oltmannsiellopsidaceae	Oltmannsiellopsidaceae	Oltmannsiellopsis viridis
OQON	Green Algae	Ulvales	Ulvellaceae	Entocladia endozoica
VBLH	Green Algae	Cladophorales	Cladophoraceae	Cladophora glomerata
NATT	Green Algae	Trentepohliales	Trentepohliaceae	Trentepohlia annulata
YDCQ	Green Algae	Trentepohliales	Trentepohliaceae	Cephaleuros virescens
CBNG	Green Algae	Ulotrichales	Borodinellaceae	Planophila laetevirens
LETF	Green Algae	Ulotrichales	Borodinellaceae	Planophila terrestris
DZPJ	Green Algae	Ulotrichales	Cylindrocapsaceae	Cylindrocapsa geminella
JIWJ	Green Algae	Ulotrichales	Ulotrichaceae	Acrosiphonia sp.
KADG	Green Algae	Ulotrichales	Ulotrichaceae	Ignatius tetrasporus
FPCO	Green Algae	Ulotrichales	Ulotrichaceae	Interfilum paradoxum
JTIG	Green Algae	Bryopsidales	Bryopsidaceae	Bryopsis plumosa
GYBH	Green Algae	Bryopsidales	Codiaceae	Codium fragile
VHIJ	Green Algae	Bryopsidales	Chaetosiphonaceae	Blastophysa cf. rhizopus
KYIO	Green Algae	Mesostigmatales	Mesostigmataceae	Mesostigma viride
RRSV	Green Algae	Pedinomonadales	Pedinomonadaceae	Pedinomonas minor
PUAN	Green Algae	Pedinomonadales	Pedinomonadaceae	Pedinomonas tuberculata
EGNB	Green Algae	Scourfieldiales	Scourfieldiaceae	Scourfieldia sp.
PRIQ	Green Algae	Pleurastrales	Pleurastraceae	Pleurastrum insigne
TGNL	Green Algae	incertae sedis	incertae sedis	Picocystis salinarum
MWXT	Green Algae	Charales	Characeae	Chara vulgaris
QPDY	Green Algae	Coleochaetales	Coleochaetaceae	Coleochaete irregularis
VQBJ	Green Algae	Coleochaetales	Coleochaetaceae	Coleochaete scutata
DRGY	Green Algae	Coleochaetales	Chaetosphaeridiaceae	Chaetosphaeridium globosum
FQLP	Green Algae	Klebsormidiales	Klebsormidiaceae	Klebsormidium subtile
AZZW	Green Algae	Klebsormidiales	Klebsormidiaceae	Chlorokybus atmophyticus
BFIK	Green Algae	Klebsormidiales	Klebsormidiaceae	Entransia fimbriata
JOJQ	Green Algae	Zygnematales	Zygnemataceae	Cylindrocystis cushleckae
ZRMT	Green Algae	Zygnematales	Zygnemataceae	Mougeotia sp.
HAOX	Green Algae	Zygnematales	Zygnemataceae	Spirogyra sp.
WGMD	Green Algae	Zygnematales	Zygnemataceae	Zygnema sp.
MFZO	Green Algae	Zygnematales	Zygnemataceae	Zygnemopsis sp.
DRFX	Green Algae	Zygnematales	Closteriaceae	Closterium lunula
DFDS	Green Algae	Zygnematales	Desmidiaceae	Desmidium aptogonum
QWFV	Green Algae	Zygnematales	Desmidiaceae	Bambusina borreri
HIDG	Green Algae	Zygnematales	Desmidiaceae	Cosmarium broomei
MNNM	Green Algae	Zygnematales	Desmidiaceae	Cosmarium granatum
STKJ	Green Algae	Zygnematales	Desmidiaceae	Cosmarium ochthodes
HJVM	Green Algae	Zygnematales	Desmidiaceae	Cosmarium ochthodes
WDGV	Green Algae	Zygnematales	Desmidiaceae	Cosmarium subtumidum
BHBK	Green Algae	Zygnematales	Desmidiaceae	Cosmarium tinctum
RQFE	Green Algae	Zygnematales	Desmidiaceae	Cosmocladium cf. constrictum
GYRP	Green Algae	Zygnematales	Desmidiaceae	Euastrum affine
MCHJ	Green Algae	Zygnematales	Desmidiaceae	Micrasterias fimbriata
GGWH	Green Algae	Zygnematales	Desmidiaceae	Onychonema laeve
RPQV	Green Algae	Zygnematales	Desmidiaceae	Phymatodocis nordstedtiana
MOYY	Green Algae	Zygnematales	Desmidiaceae	Pleurotaenium trabecula
ISHC	Green Algae	Zygnematales	Desmidiaceae	Staurastrum sebaldi
WCQU	Green Algae	Zygnematales	Desmidiaceae	Staurodesmus convergens
RPRU	Green Algae	Zygnematales	Desmidiaceae	Staurodesmus omearii
GBGT	Green Algae	Zygnematales	Desmidiaceae	Xanthidium antilopaeum
WSJO	Green Algae	Zygnematales	Mesotaeniaceae	Mesotaenium braunii
HKZW	Green Algae	Zygnematales	Mesotaeniaceae	Mesotaenium caldariorum
WDCW	Green Algae	Zygnematales	Mesotaeniaceae	Mesotaenium endlicherianum
NBYP	Green Algae	Zygnematales	Mesotaeniaceae	Mesotaenium kramstae
YOXI	Green Algae	Zygnematales	Mesotaeniaceae	Cylindrocystis brebissonii
RPGL	Green Algae	Zygnematales	Mesotaeniaceae	Cylindrocystis brebissonii
VAZE	Green Algae	Zygnematales	Mesotaeniaceae	Cylindrocystis sp.
FFGR	Green Algae	Zygnematales	Mesotaeniaceae	Netrium digitus
KMNX	Green Algae	Zygnematales	Mesotaeniaceae	Nucleotaenium eifelense
SNOX	Green Algae	Zygnematales	Mesotaeniaceae	Planotaenium ohtanii
XRTZ	Green Algae	Zygnematales	Mesotaeniaceae	Roya obtusa
NNHQ	Green Algae	Zygnematales	Mesotaeniaceae	Spirotaenia minuta
TPHT	Green Algae	Zygnematales	Mesotaeniaceae	Spirotaenia sp.
YSQT	Green Algae	Zygnematales	Peniaceae	Penium exiguum
AEKF	Green Algae	Zygnematales	Peniaceae	Penium margaritaceum
KEYW	Green Algae	Zygnematales	Gonatozygaceae	Gonatozygon kinahanii
OBUY	Red Algae	Porphyridiales	Porphyridiaceae	Porphyridium cruentum
PVGP	Red Algae	Porphyridiales	Porphyridiaceae	Porphyridium purpureum
RSOF	Red Algae	Glaucosphaerales	Glaucosphaeraceae	Glaucosphaera vacuolata
JJZR	Red Algae	Rhodochaetales	Rhodochaetaceae	Rhodochaete parvula
LLXJ	Red Algae	Stylonematales	Stylonemataceae	Chroodactylon ornatum
ZULJ	Red Algae	Bangiales	Bangiaceae	Pyropia yezoensis
VZWX	Red Algae	Ceramiales	Ceramiaceae	Ceramium kondoi
YSBD	Red Algae	Ceramiales	Dasyaceae	Heterosiphonia pulchra
XAXW	Red Algae	Ceramiales	Rhodomelaceae	Neosiphonia japonica
UYFR	Red Algae	Ceramiales	Rhodomelaceae	Symphyocladia latiuscula
IEHF	Red Algae	Gigartinales	Dumontiaceae	Dumontia simplex
SBLT	Red Algae	Gigartinales	Endocladiaceae	Gloiopeltis furcata
UGPM	Red Algae	Gigartinales	Gigartinaceae	Chondrus crispus
WEJN	Red Algae	Gigartinales	Gigartinaceae	Mazzaella japonica
CKXF	Red Algae	Gigartinales	Phyllophoraceae	Ahnfeltiopsis flabelliformis
BWVJ	Red Algae	Gigartinales	Solieriaceae	Betaphycus philippinensis
JEBK	Red Algae	Gigartinales	Solieriaceae	Eucheuma denticulatum
IHJY	Red Algae	Gigartinales	Solieriaceae	Kappaphycus alvarezii
FTRP	Red Algae	Gracilariales	Gracilariaceae	Gracilaria chouae
VNAL	Red Algae	Gracilariales	Gracilariaceae	Gracilaria vermiculophylla
LJPN	Red Algae	Gracilariales	Gracilariaceae	Gracilaria blodgettii
IKWM	Red Algae	Gracilariales	Gracilariaceae	Gracilaria lemaneiformis
ZJOJ	Red Algae	Halymeniales	Halymeniaceae	Grateloupia filicina
IKIZ	Red Algae	Halymeniales	Halymeniaceae	Grateloupia livida
URSB	Red Algae	Halymeniales	Halymeniaceae	Grateloupia turuturu
PYDB	Red Algae	Halymeniales	Halymeniaceae	Grateloupia catenata
PWKQ	Red Algae	Halymeniales	Halymeniaceae	Gracilaria sp.
RTLC	Red Algae	Rhodellales	Rhodellaceae	Rhodella violacea
