# Supplementary material for: Origin and evolution of the nuclear auxin response system
Source: eLife journal article supplement (doi:10.7554/elife.33399), 2018-03-26
Supplement: supp [file elife-33399-supp-v1.zip › elife_poa_e33399_Supplementary_File_3.xlsx]

## Sheet: Sheet1
Supplementary file 3. Primers used in this study.
Name	Sequence	Experiment	Gene
HK001	ctcgGCTGTGGCACGCCTGCGC	CRISPR	MpARF3
HK002	aaacGCGCAGGCGTGCCACAGC	CRISPR	MpARF3
HK003	ctcgCGCTCTGCGTGAGCGTCT	CRISPR	MpARF3
HK004	aaacAGACGCTCACGCAGAGCG	CRISPR	MpARF3
HK026	TTTTCTAGACCCAAACAGAAAGGAGCCGG	cloning	MpARF3
HK027	CACCATGCCCGGGCCAAGCCCTGG	cloning	MpARF3
HK028	CTGCGACCGCGTTTTGCC	cloning	MpARF3
HK079	TCGCGAGGAGTGAGTGAGTA	genotyping	MpARF3
HK111	ttttctagaTCTCTGCGCTCCCCTACTGAAG	cloning	MpARF3
HK131	GGGAACCAGGTGTGATCG	genotyping	MpARF3
HK137	ACCCAATCTGACGCCAACAACGGAGGC	mutagenesis	MpARF3
HK138	CAAGGTTTTAGCGAACGAGGCCGGCTTC	mutagenesis	MpARF3
HK162	ctcgAGGAGTTGTCGGTGCTGC	CRISPR	MpncARF
HK163	aaacGCAGCACCGACAACTCCT	CRISPR	MpncARF
HK168	ctcgTACGGACCGCAACCTCGG	CRISPR	MpncIAA
HK169	aaacCCGAGGTTGCGGTCCGTA	CRISPR	MpncIAA
HK172	TGTTTACTCCGGGGAAGAAG	genotyping	MpncARF
HK173	GGCAAGACGCTTTGTAGAGG	genotyping	MpncARF
HK174	ATTTGGAGCGTGTGCAGAG	genotyping	MpncIAA
HK175	GTCGTTGCAATTGCTGTTGT	genotyping	MpncIAA
HK197	AGATTGCCGCCCGAAAG	qPCR	MpYUC2
HK198	TGGTTGGCAGACCACATGC	qPCR	MpYUC2
HK201	AAGCCGTCGAAAAGAAGGAG	qPCR	MpEF1a
HK202	TTCAGGATCGTCCGTTATCC	qPCR	MpEF1a
HK259	AAGCGTGGTCTCAAGGGAAC	qPCR	AaYUC
HK260	GCATCGGGCAGACACATATC	qPCR	AaYUC
HK263	GGACAACAGGTCCACTTTGG	qPCR	AaC2HDZ
HK264	ATGAGGGAGGGAGGAAGATG	qPCR	AaC2HDZ
HK286	GGCAGCCAGCCATGTAAGTAG	qPCR	MpC2HDZ; Mapoly0069s0069
HK287	CCGGCAGAATTGAGACATTG	qPCR	MpC2HDZ; Mapoly0069s0069
HK292	TCCTTCTCCGTGAAGACCAG	qPCR	MpEXP; Mapoly0061s0098
HK293	CTGCTGCGAGAGCCTAGAAC	qPCR	MpEXP; Mapoly0061s0098
HK306	GGGTCGCAATACAGGAAAGG	qPCR	MpWIP; Mapoly0096s0050
HK307	CGGGTGGTCGATGTTGTTC	qPCR	MpWIP; Mapoly0096s0050
HK324	GCTTCCATTCAAGCCATTCC	qPCR	CrYUC
HK325	ACTCGCGCGCATATTCATC	qPCR	CrYUC
HK326	GCGAGTCGTTGACAGAGGAG	qPCR	CrC2HDZ
HK327	AGGCAAAGGCATGCAAAAG	qPCR	CrC2HDZ
