# Supplementary figures and images for: Origin and evolution of the nuclear auxin response system
Source: eLife journal article supplement (doi:10.7554/elife.33399), 2018-03-26

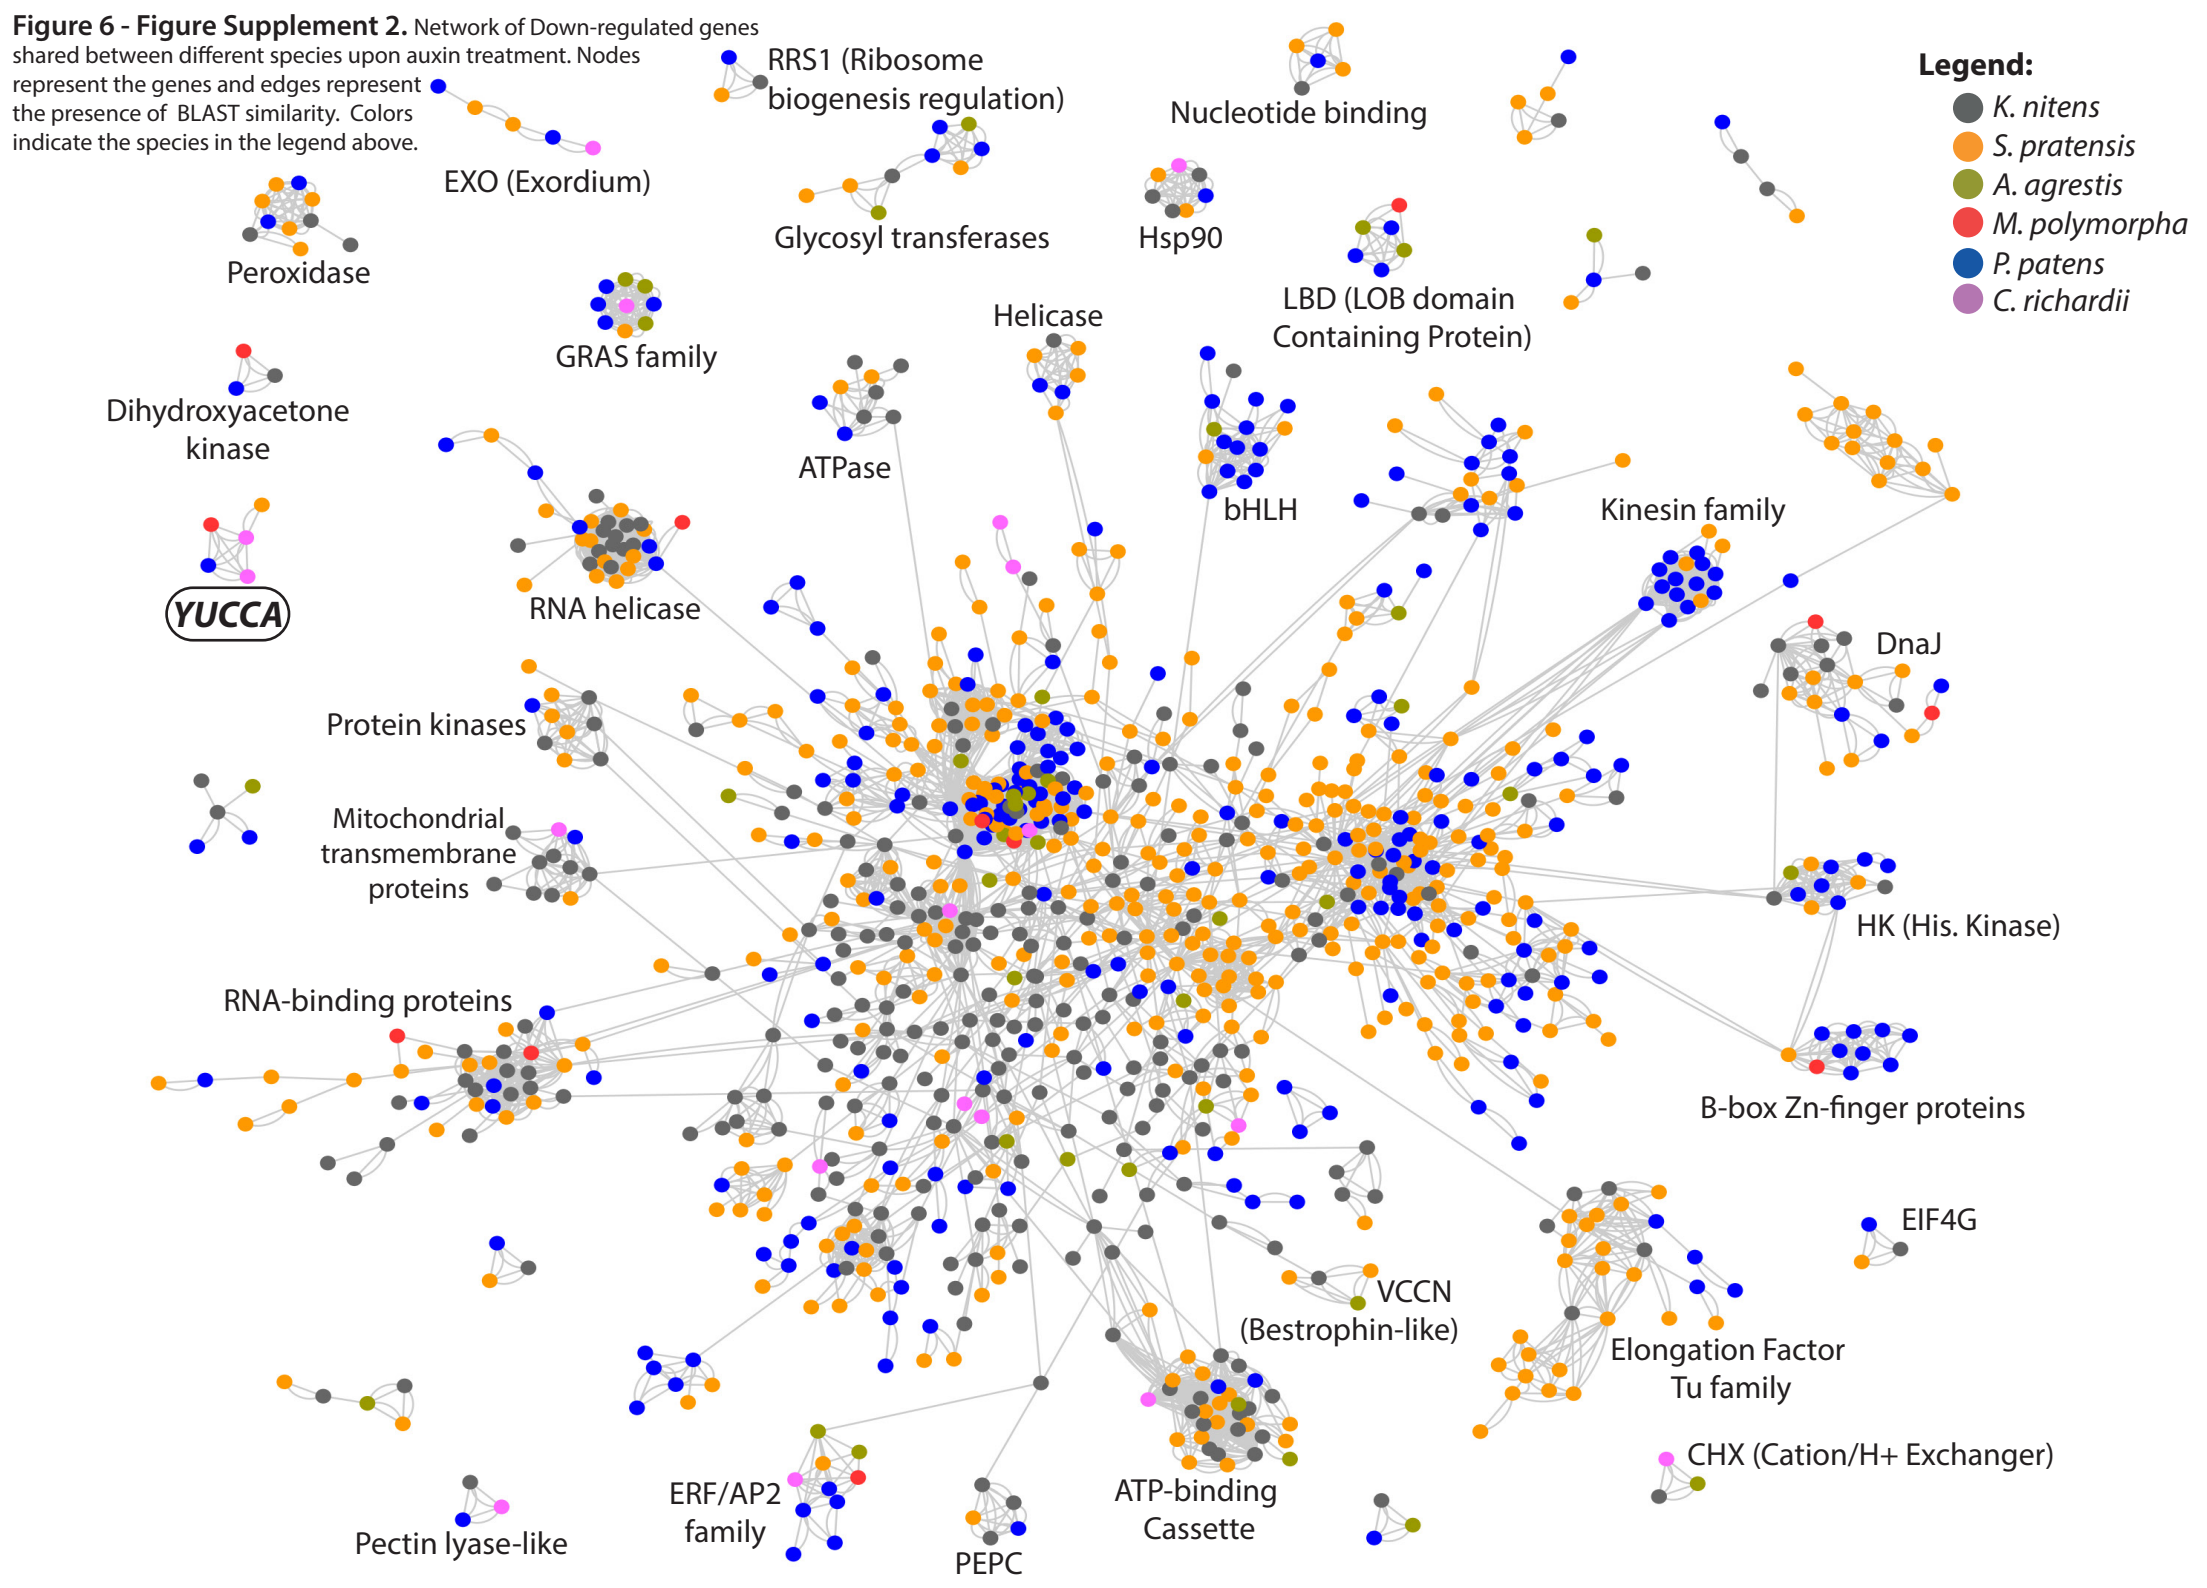

Supplement: supp [file elife-33399-supp-v1.zip]

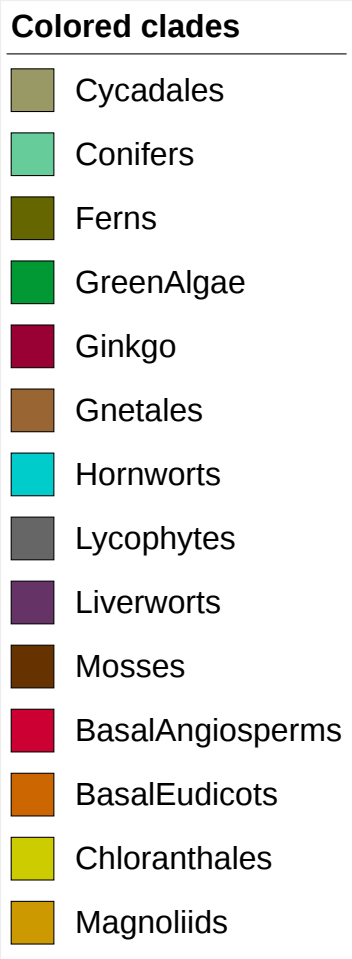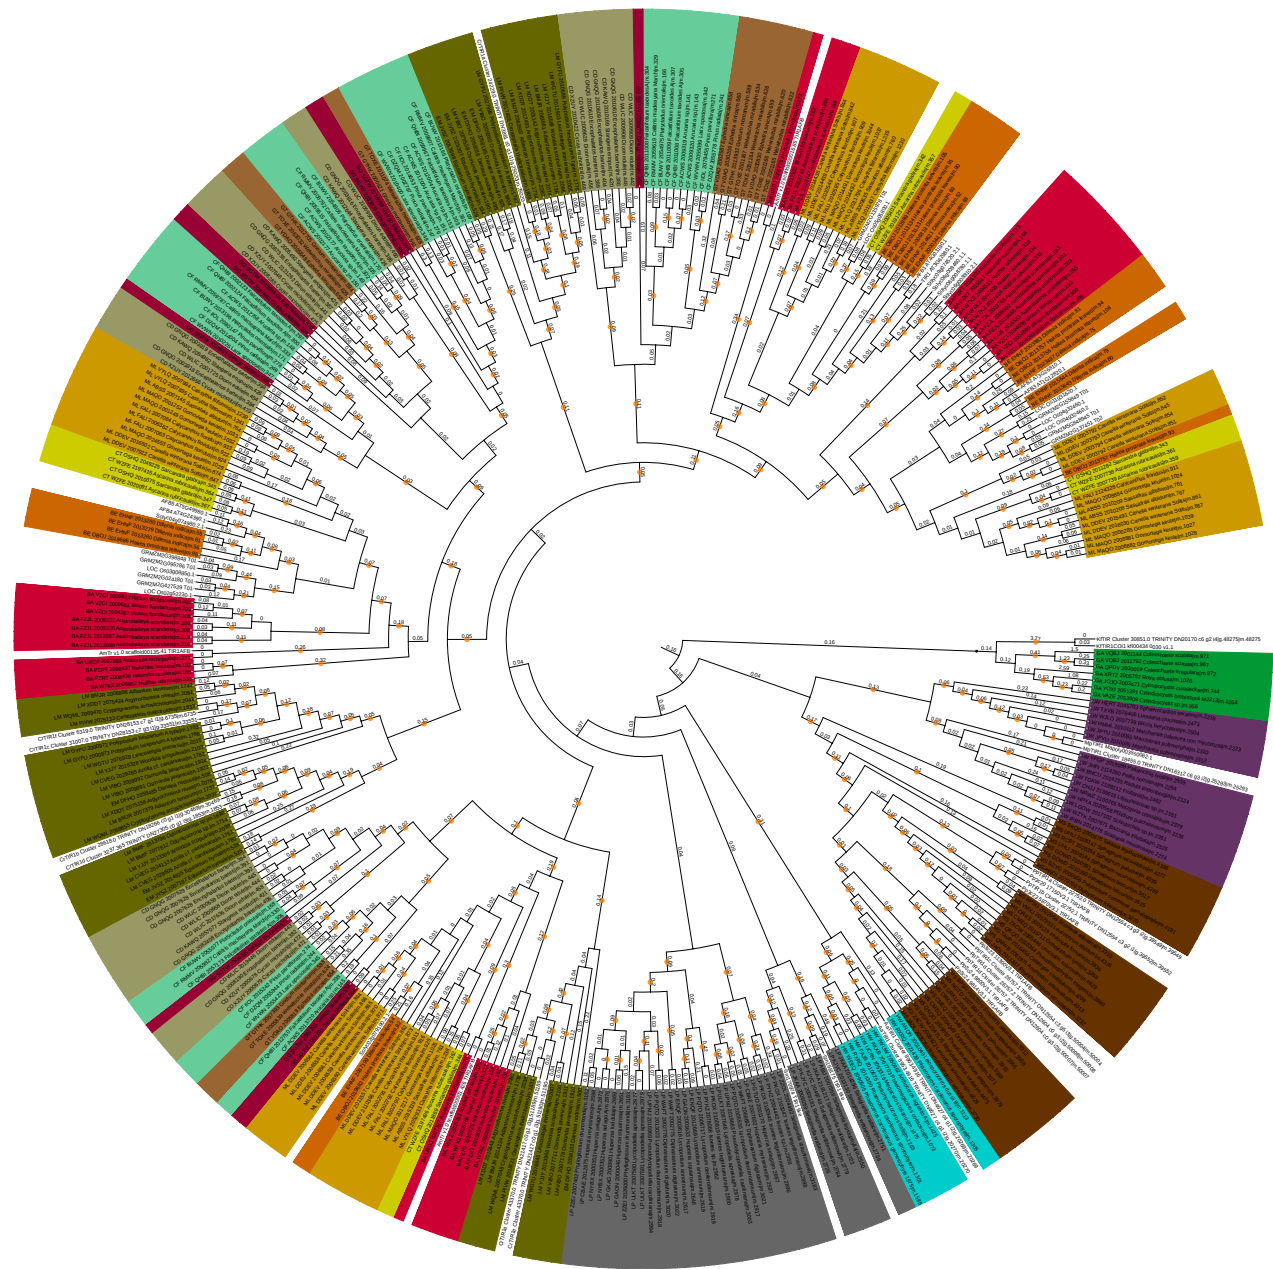

Supplement: supp [file elife-33399-supp-v1.zip]

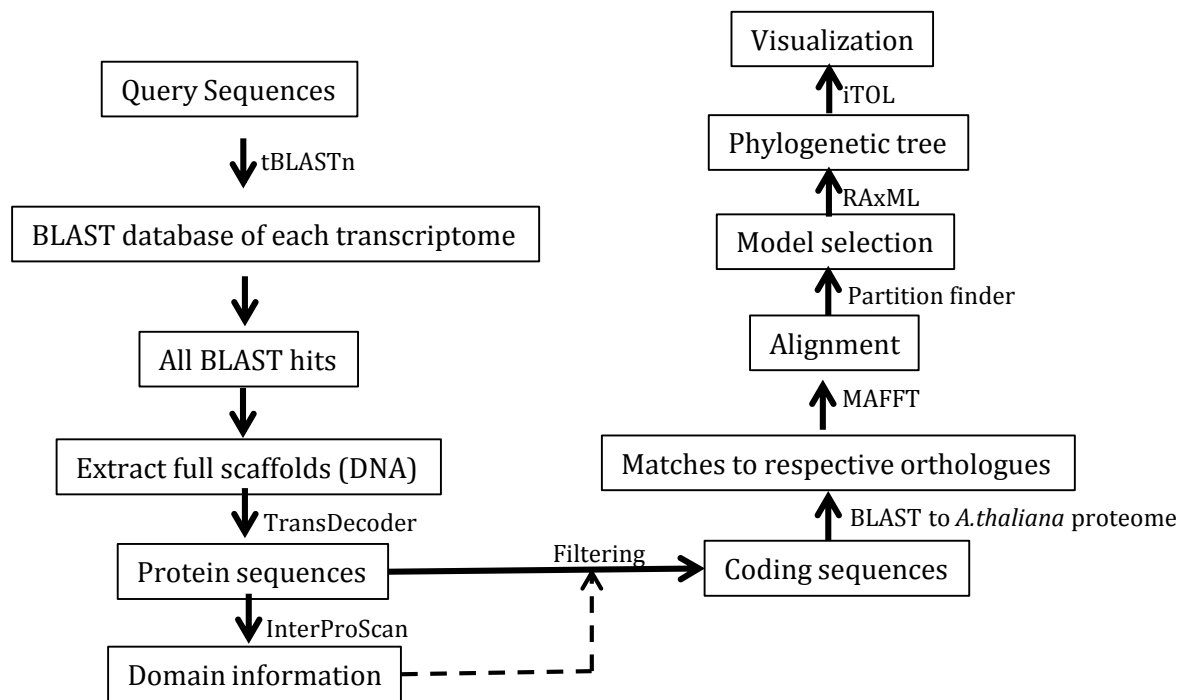

**Figure1 - Figure supplement 1.** The work flow of phylogenetic tree construction.

Supplement: supp [file elife-33399-supp-v1.zip]

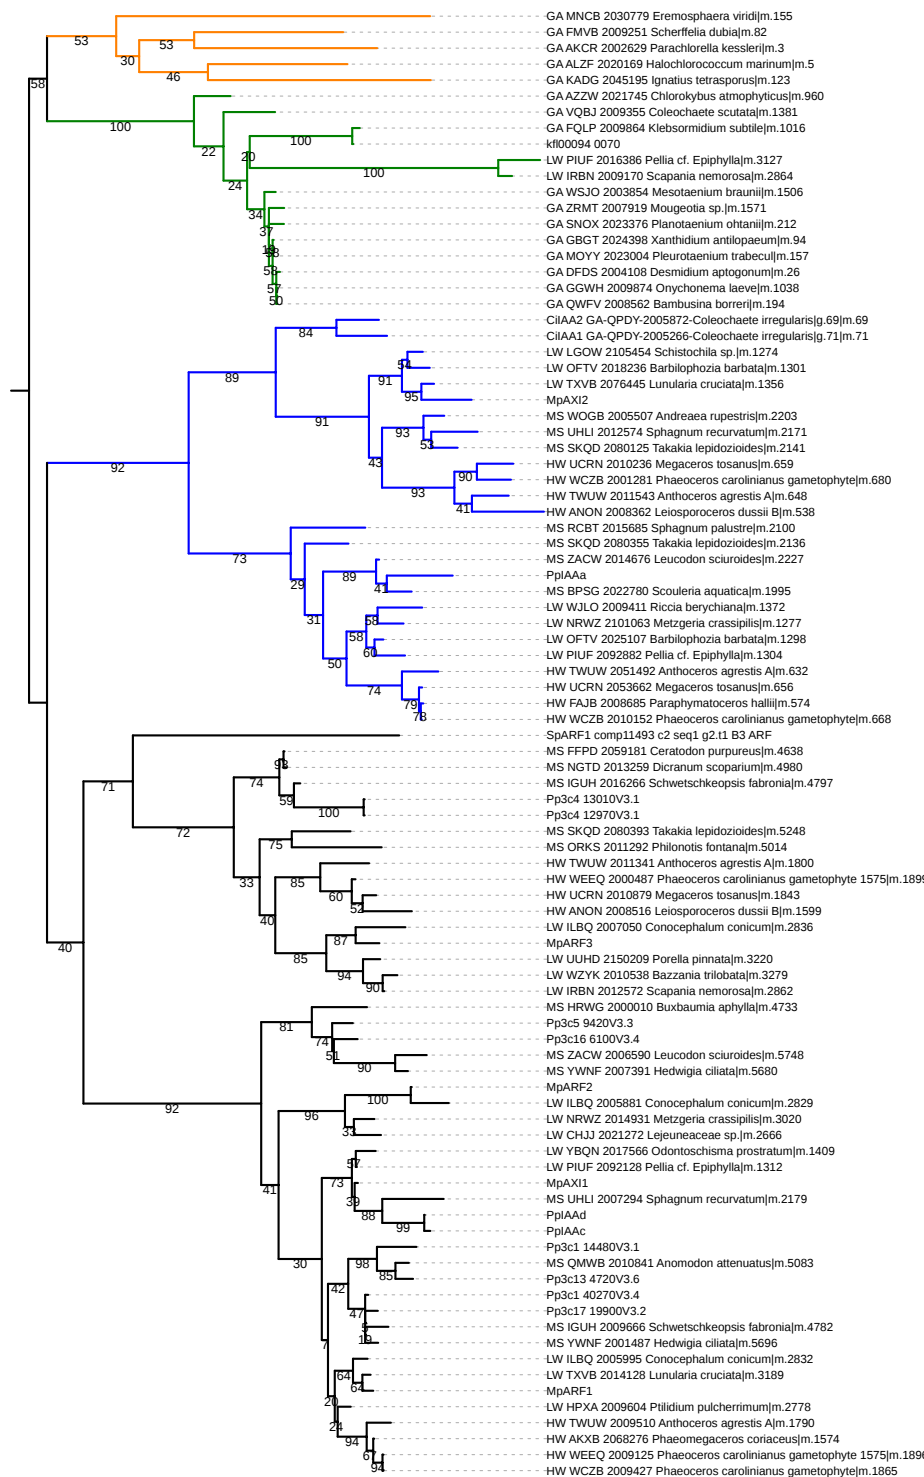

Supplement: supp [file elife-33399-supp-v1.zip]

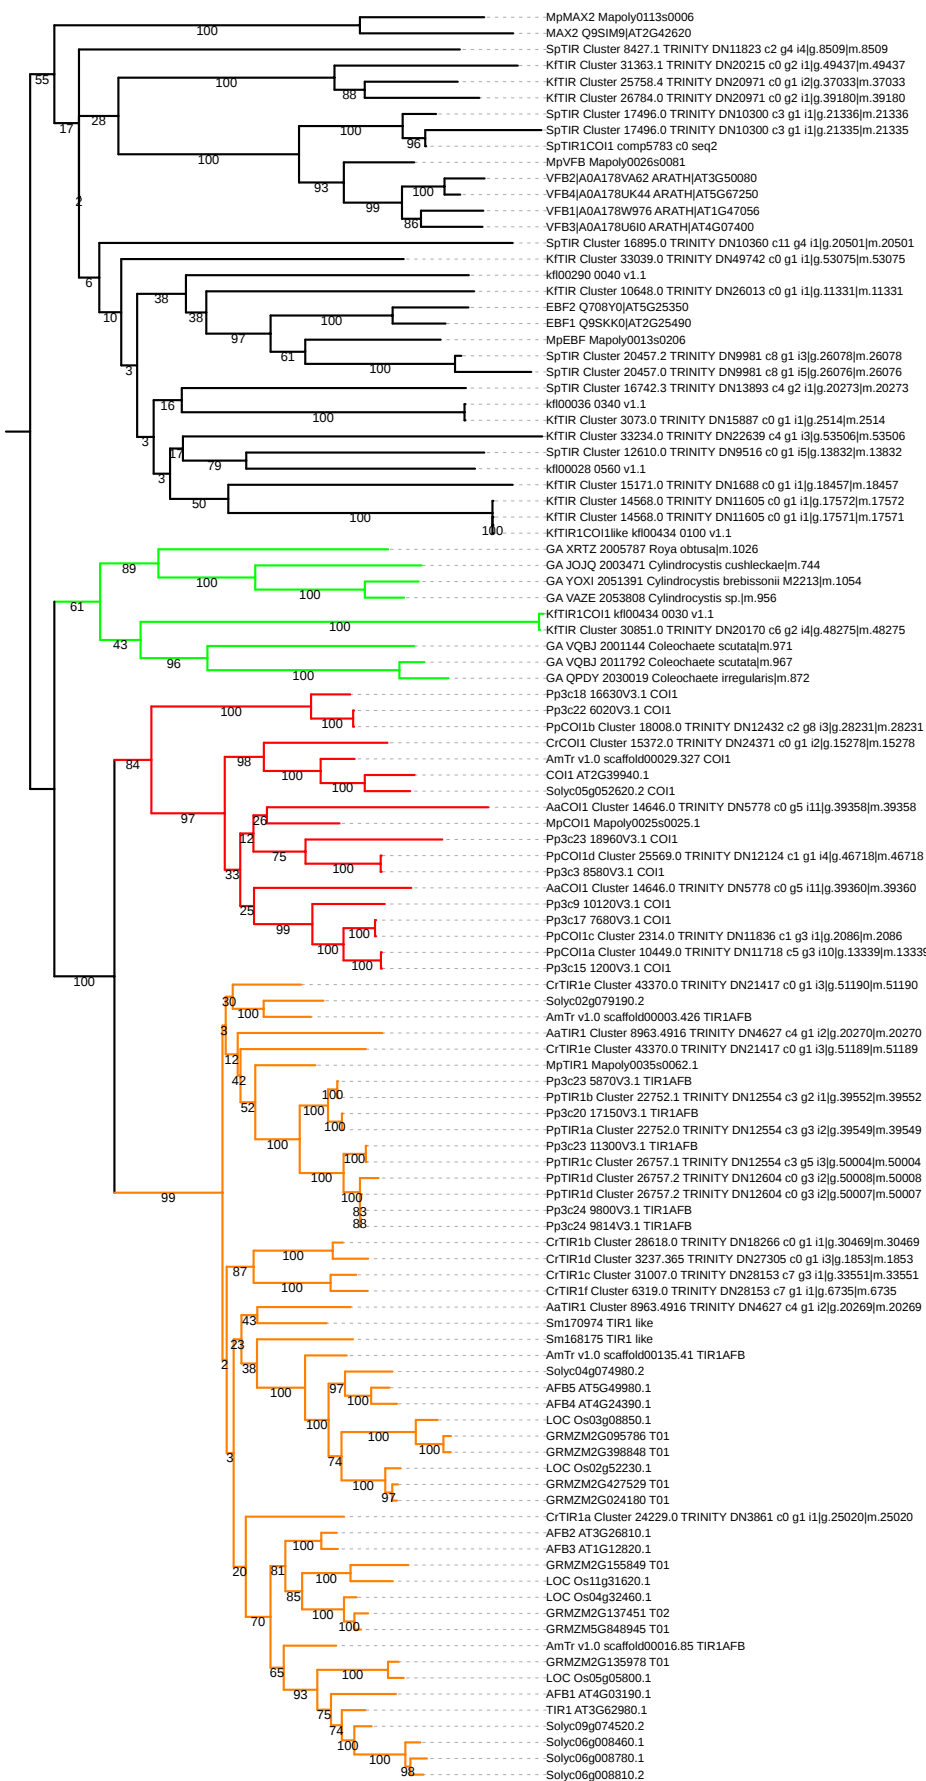

Supplement: supp [file elife-33399-supp-v1.zip]

A

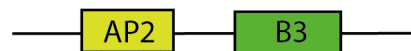

B

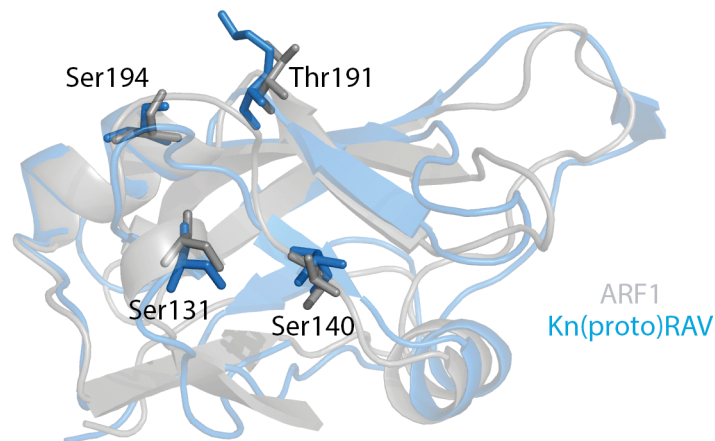

C

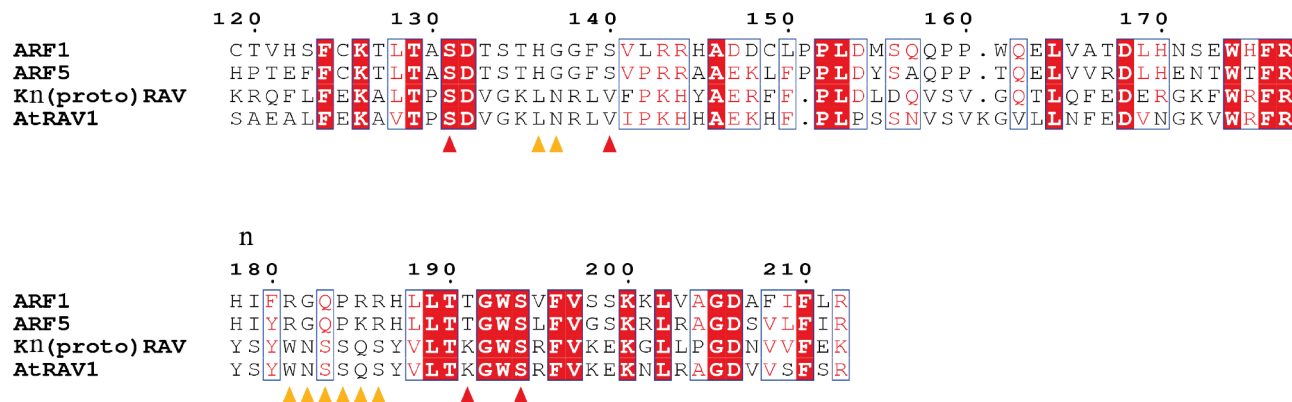

Supplement: supp [file elife-33399-supp-v1.zip]

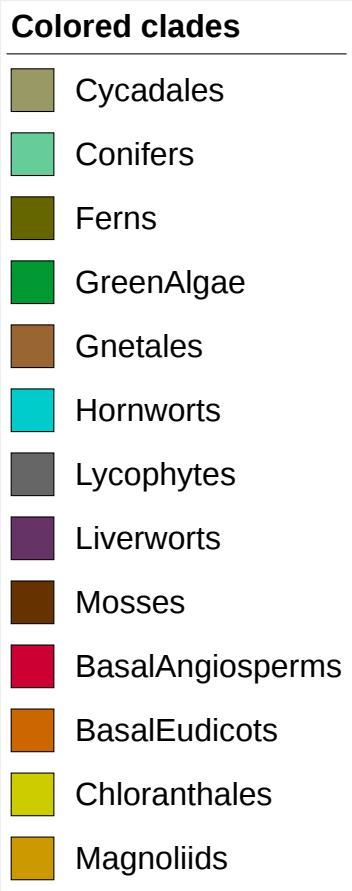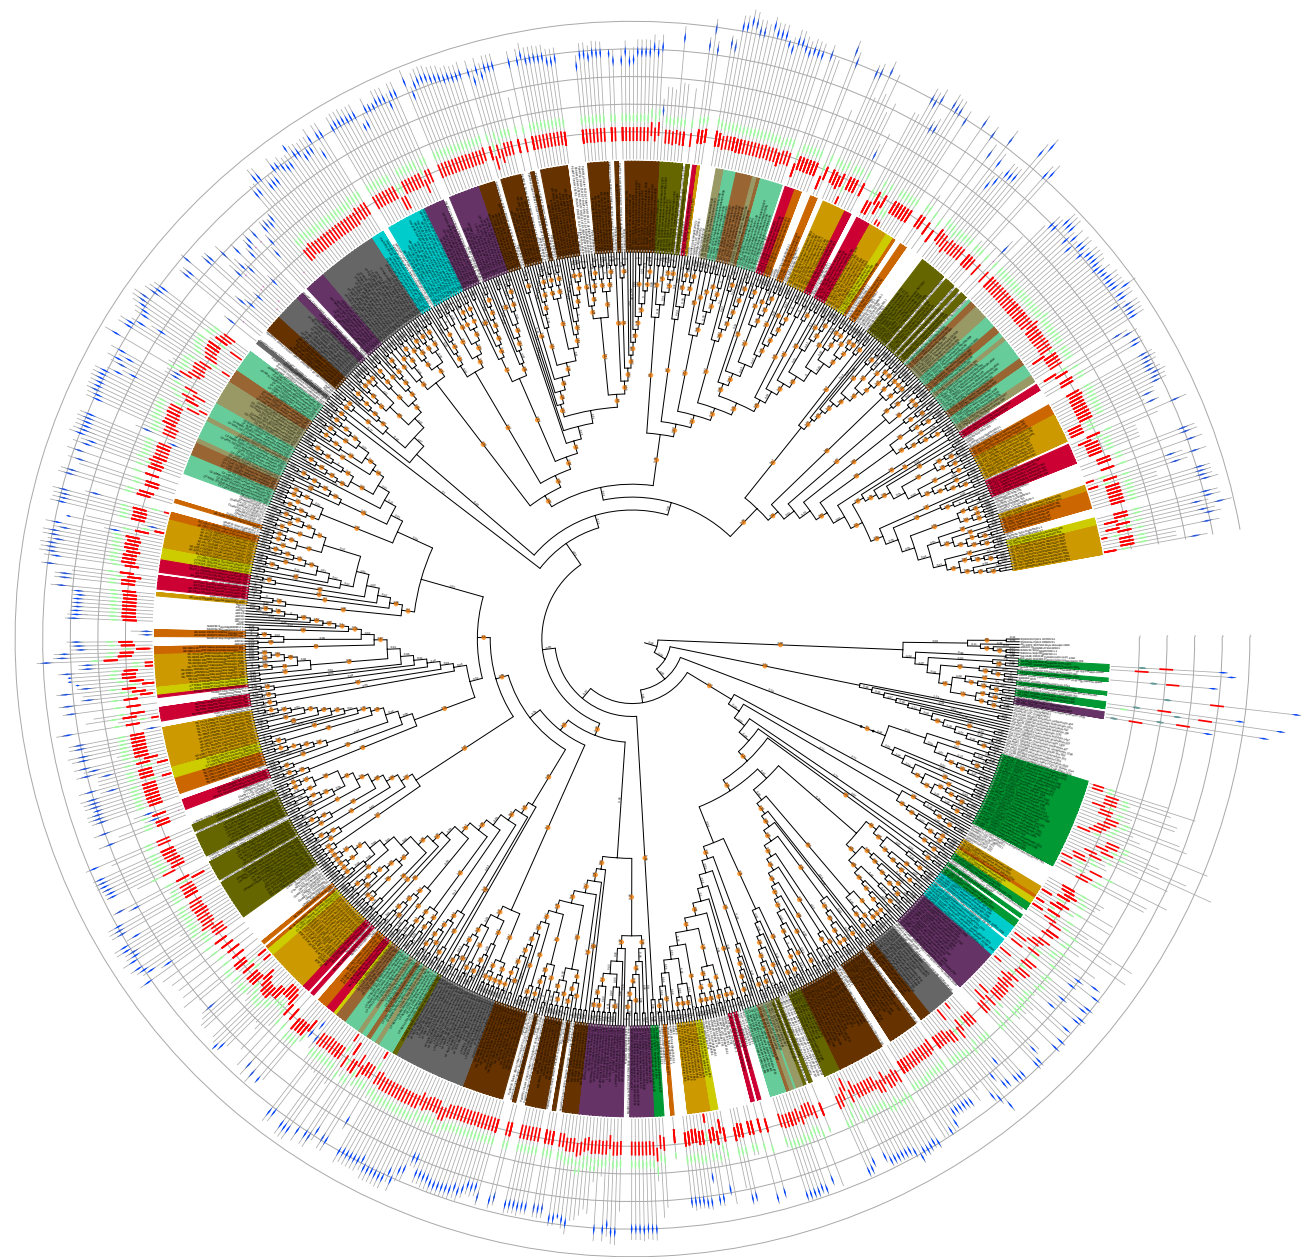

Supplement: supp [file elife-33399-supp-v1.zip › elife_poa_e33399_Figure_1_figure_supplement_2.pdf]
